# Supplementary material for: Plant Carbohydrate Scavenging through TonB-Dependent Receptors: A Feature Shared by Phytopathogenic and Aquatic Bacteria
Source: PLOS journal article supplement (doi:10.1371/journal.pone.0000224), 2007-02-20
Supplement: S1 (10.1371/journal.pone.0000224.s001) [file journal.pone.0000224.s001]

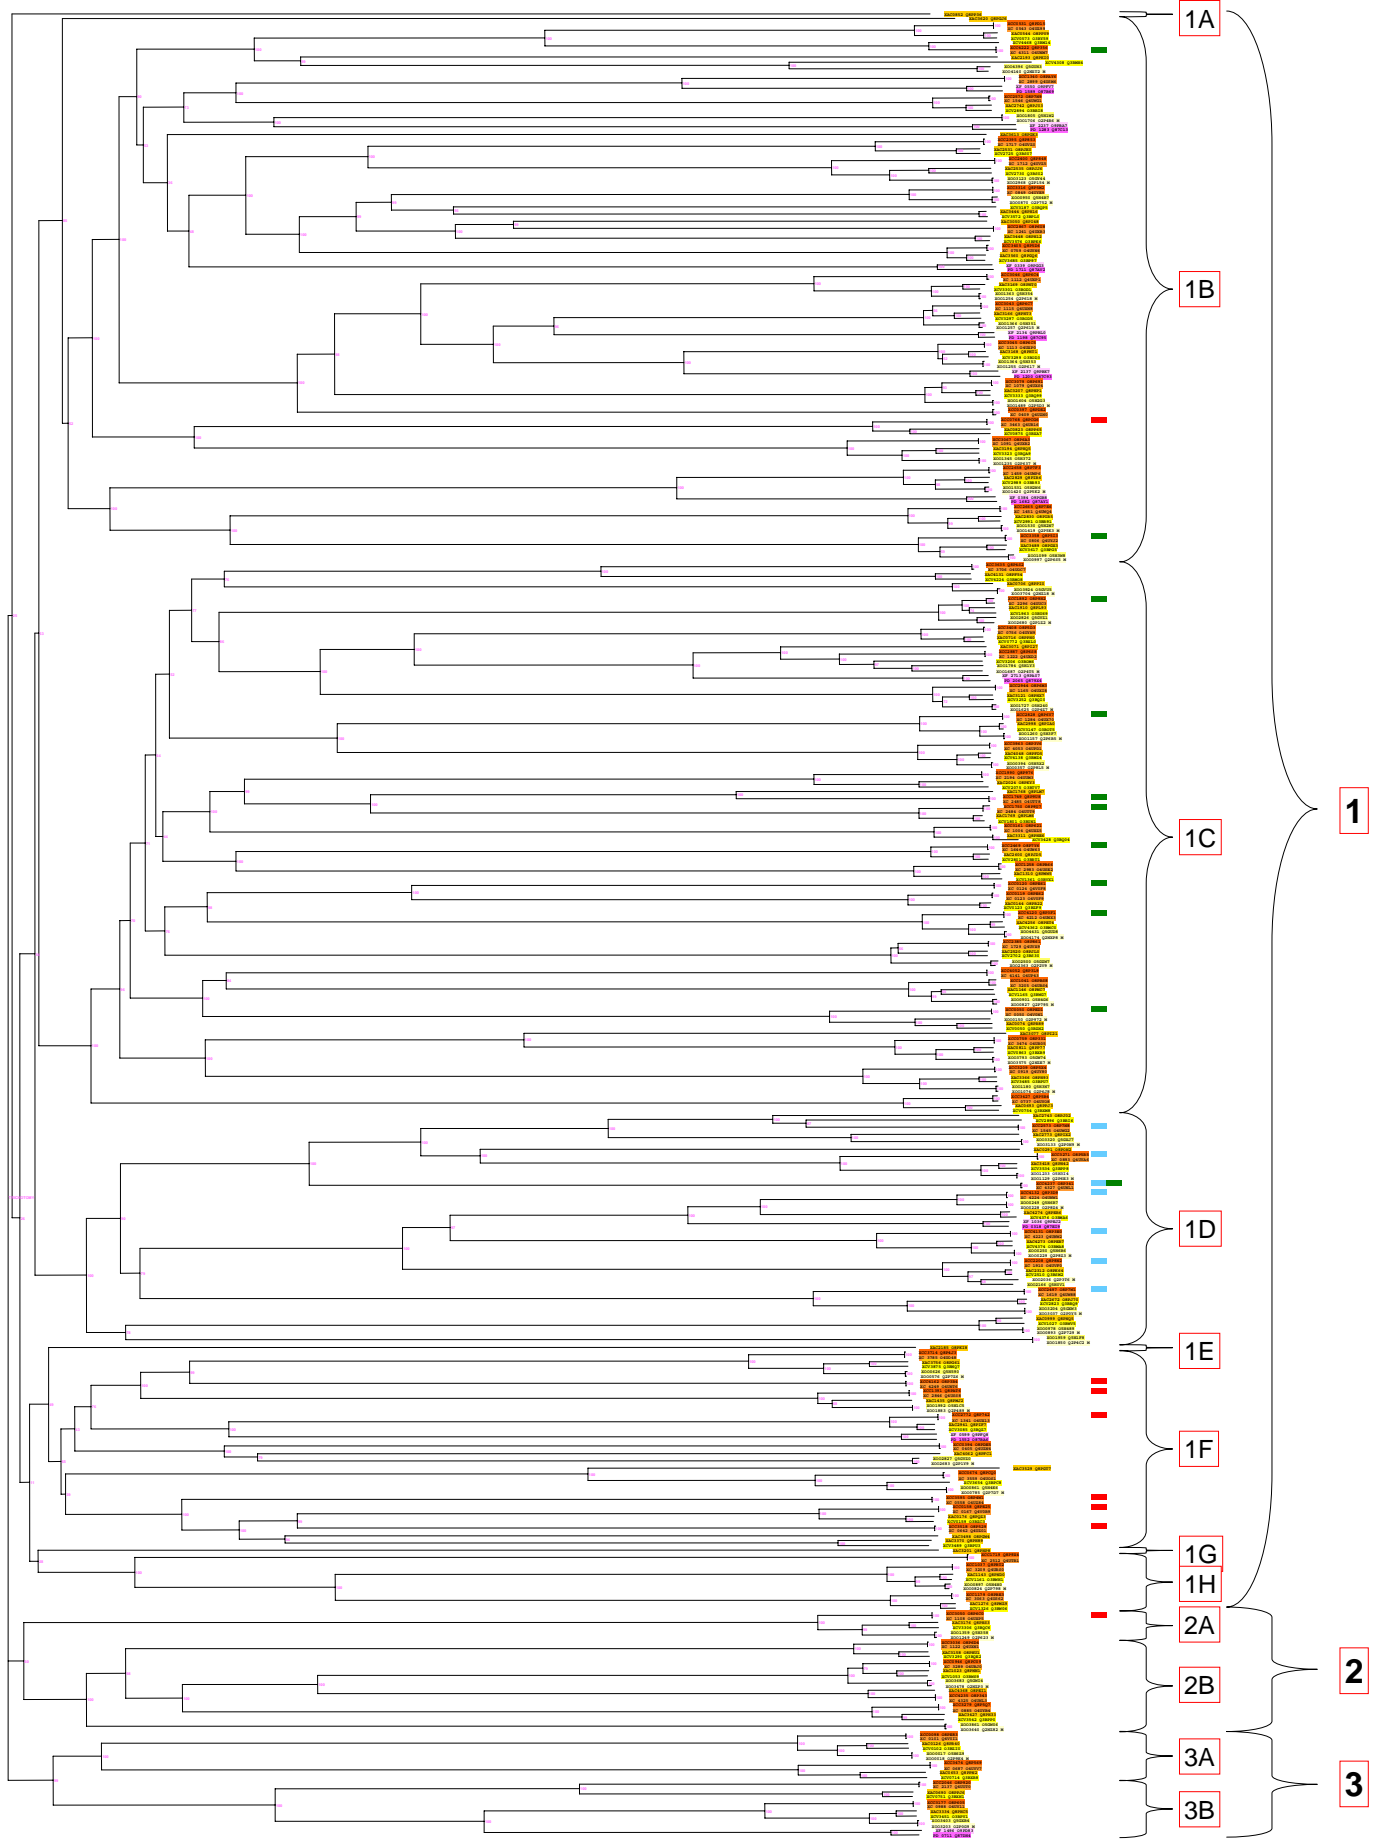

**XCC** : *Xanthomonas campestris* pv. *campestris*, strain ATCC33913  
**XC** : *Xanthomonas campestris* pv. *campestris*, strain 8004  
**XAC** : *Xanthomonas axonopodis* pv. *citri*, strain 306  
**XCV** : *Xanthomonas campestris* pv. *vesicatoria*, strain 85-10  
**XOO** : *Xanthomonas oryzae* pv. *oryzae*, strain KACC10331  
**XOO M** : *Xanthomonas oryzae* pv. *oryzae*, strain MAFF311018  
**XF** : *Xylella fastidiosa*, strain 9a5c  
**PD** : *Xylella fastidiosa*, strain PD

■ TBDR gene induced by iron starvation  
■ TBDR gene induced by plant carbohydrates  
■ TBDR of the oar subclass
