# Supplementary material for: Plant Carbohydrate Scavenging through TonB-Dependent Receptors: A Feature Shared by Phytopathogenic and Aquatic Bacteria
Source: PLoS One. 2007 Feb 21;2(2):e224. doi: 10.1371/journal.pone.0000224 (PMC1790865; doi:10.1371/journal.pone.0000224)
Supplement: Table S3 — Genome context of Xanthomonas campestris pv. campestris (Xcc) TonB-dependent receptor (TBDR) genes and definition of putative CUT loci, conservation in Xanthomonads or in other genera, and TBDR conservation in Pseudomonas aeruginosa PAO1. (0.18 MB XLS) [file pone.0000224.s005.xls]

## Sheet: Feuil1
	Xanthomonas campestris pv. campestris strain ATCC33913							Orthologs c in:					Representative homologs in non Xanthomonads bacteria d	Conservation in Pseudomonas aeruginosa PAO1 (Identity/Similarity%) e
	Gene ID a	Function a	Orientation a	Gene name a	CAZy family b	Characteristics		Xcc strain 8004	X. campestris pv. vesicatoria strain 85-10	X. axonopodis pv. citri strain 306	X. oryzae pv. oryzae strain KACC10331	Xylella fastidiosa strain 9a5c
		putative partial CUT locus, arabinose induced TBDR
	XCC0043	transcriptional regulator	+					XC_0043	abs	abs	abs	abs
	XCC0044	transcriptional regulator	-					XC_0044	abs	abs	abs	abs
	XCC0045	methicillin resistance protein	+	mecI				XC_0045	XCV0045	XAC0069	abs	abs
	XCC0046	ankyrin-like protein	+					XC_0046	XCV0046	XAC0070	abs	abs
	XCC0047	hypothetical protein	+					XC_0047	XCV0047	XAC0071	abs	abs
	XCC0048	hypothetical protein	+					XC_0048	XCV0048	XAC0072	XOO0173	abs
	XCC0049	hypothetical protein	-					XC_0049	XCV0049	XAC0073	XOO0172	abs	CC1790
	XCC0050	Ps-TBDR	-	cirA		Arabinose induced		XC_0050	XCV0050	XAC0074	XOO0171-70	abs	CC1791, Caulobacter crescentus CB15
	XCC0051	xylose repressor-like protein	+	xylR				XC_0051	XCV0051	XAC0075	XOO0169	abs	CC1792
	XCC0052	avirulence protein	+	avrBs2				XC_0052	XCV0052	XAC0076	XOO0168	abs
	XCC0053	hypothetical protein	-					XC_0053	XCV0054	XAC0077	XOO0167	abs
	XCC0095	TldD protein	-	tldD				XC_0097	XCV0093	XAC0122	abs	abs
	XCC0096	fructose-1,6-bisphosphatase	-	cbbFC				XC_0098	XCV0098	XAC0124	XOO0015	abs
	XCC0097	aromatic-amino-acid aminotransferase	-	tyrB				XC_0100	XCV0101	XAC0125	XOO0016	XF0036
	XCC0098	Ps-TBDR	+	yncD				XC_0101	XCV0102	XAC0126	XOO0017	abs	BB0832, Bordetella bronchiseptica RB50	PA2289 (39/54)
	XCC0099	hypothetical protein	+					XC_0102	XCV0103	XAC0127	abs	abs
	XCC0100	hypothetical protein	+					XC_0103	XCV0104	abs	abs	abs
	XCC0101	chloroacetaldehyde dehydrogenase	+	aldA				XC_0104	XCV0105	XAC0129	abs	abs
		putative partial CUT locus, CAZy associated TBDR, polygalacturonate induced TBDR
	XCC0115	hypothetical protein	+					XC_0119	XCV0120	XAC0141	XOO0027	XF1835
	XCC0116	hypothetical protein	+					XC_0120	XCV0121	XAC0142	abs	abs
	XCC0117	hypothetical protein	-					XC_0121	abs	abs	abs	abs
	XCC0118	2-keto-3-deoxygluconate kinase	-	kdgK				XC_0122	XCV0122	XAC0143	XOO0028	abs
	XCC0119	TBDR	+	iroN				XC_0123	XCV0123	XAC0144	abs	abs	Mmar10_0224, Maricaulis maris MCS10
	XCC0120	TBDR	+	iroN		PGA induced		XC_0124	abs	abs	abs	abs	CC0442, Caulobacter crescentus CB15
	XCC0121	pectin methyl esterase	+		CE8			XC_0125	abs	abs	abs	abs
	XCC0122	pectate lyase	+		PL10			XC_0126	abs	abs	abs	abs
	XCC0123	hypothetical protein	+					XC_0127	XCV0124	XAC0145	abs	abs
	XCC0124	hypothetical protein	+					XC_0128	abs	abs	abs	abs
	XCC0125	hypothetical protein	+					XC_0130	abs	abs	abs	abs
	XCC0126	deoxycytidylate deaminase	+					XC_0132	abs	abs	abs	abs
	XCC0127	IS1479 transposase	-					XC_0133	XCV0129	abs	abs	abs
		Fur regulated TBDR
	XCC0154	rhamnogalacturonan acetylesterase	+		CE12			XC_0163	XCV0155	XAC0171	XOO0265	abs
	XCC0155	hypothetical protein	-					XC_0164	XCV0156	XAC0173	XOO0266	abs
	XCC0156	phenylalanine hydroxylase	-	pah				XC_0165	XCV0157	XAC0174	XOO0267	abs
	XCC0157	transcriptional regulator asnC family	+					XC_0166	XCV0158	XAC0175	XOO0268	abs
	XCC0158	TBDR	+	fpvA		Fur-regulated		XC_0167	XCV0159	XAC0176	XOO0271-70-69	abs	PSEEN2482, Pseudomonas entomophila L48	PA2398; FpvA (36/52)
	XCC0159	hypothetical protein	-					XC_0168	XCV0160	XAC0177	XOO4518	XF0066
	XCC0160	hypothetical protein	-					XC_0169	XCV0162	XAC0178	XOO4517	abs
	XCC0161	ABC transporter ATP-binding protein	-	ylma				XC_0170	XCV0163	XAC0179	XOO4515	abs
	XCC0162	fatty acid desaturase	+					XC_0171	XCV0164	XAC0180	XOO4514	abs
		putative partial CUT locus
	XCC0301	transcriptional regulator lysR family	-					XC_0312	XCV0325	XAC0316	XOO4350	abs
	XCC0302	MFS transporter	+	ynfM				XC_0313	XCV0326	XAC0317	XOO4349	abs
	XCC0303	hypothetical protein	-					XC_0314	abs	abs	abs	abs
	XCC0304	Ps-TBDR	-					XC_0315	abs	abs	abs	abs	Sala_0305, Sphingopyxis alaskensis RB2256
	XCC0305		-	fhuA				XC_0316	abs	abs	abs	abs	CPS_3961, Colwellia psychrerythraea 34H
	XCC0306	SIR2-like regulatory protein	+					XC_0318	XCV0329	XAC0320	XOO4347	abs
	XCC0307	FMN oxidoreductase	+	frp				XC_0319	XCV0330	XAC0321	XOO4346	abs
	XCC0308	dehydrogenase	+					XC_0320	XCV0331	XAC0322	XOO4345	abs
	XCC0391	tRNA	+					XC_0001_tRNA	XCV0001_tRNA	XAC0391_tRNA	XOO4657_tRNA	XFt02_tRNA
	XCC0392	phage-related integrase	+					XC_0403	abs	abs	abs	abs
	XCC0393	IS1481 transposase	+					abs	abs	XAC4328	abs	abs
	XCC0394	TBDR	-	fhuA				XC_0405	abs	abs	abs	abs	Bcep18194_B2705, Burkholderia sp. 383	PA2911 (41/57)
	XCC0395	superoxidase dismutase	-	sodM				XC_0407	abs	abs	XOO2828	XF1921
	XCC0396	hypothetical protein	+					XC_0408	abs	abs	abs	abs
	XCC0397	Ps-TBDR	+	bfeA				XC_0409	abs	abs	abs	abs	Patl_3441, Pseudoalteromonas atlantica T6c	PA2590 (31/46); PA2089 (31/46)
	XCC0398	isopenicillin N epimerase	+	nifS				XC_0411	abs	abs	abs	abs
	XCC0399	IS1404 transposase	+					XC_0412	abs	abs	abs	abs
	XCC0400	IS1404 transposase	+					XC_0413	XCV0022 D	XAC3936	abs	abs
	XCC0523	60kDa chaperonin	+	groEL				XC_0535	XCV0571	XAC0542	XOO4288	XF0615
	XCC0524	helicase	+					XC_0536	abs	abs	abs	abs
	XCC0525	ATP-dependent DNA helicase	+					XC_0537	abs	abs	abs	abs
	XCC0526	hypothetical protein	+					XC_0538	abs	abs	abs	abs
	XCC0527	hypothetical protein	+					XC_0539	abs	abs	abs	abs
	XCC0528	hypothetical protein	+					XC_0540	abs	abs	abs	abs
	XCC0529	hypothetical protein	-					XC_0541	XCV0572	XAC0543	XOO4287	abs
	XCC0530	hypothetical protein	-					XC_0542	XCV0572	XAC0543	XOO4287	abs
	XCC0531	Ps-TBDR	+					XC_0543	XCV0573	XAC0544	XOO4285	abs	PA2057, Pseudomonas aeruginosa PAO1	PA2057 (33/48)
	XCC0532	hypothetical protein	-					XC_0544	abs	abs	abs	abs
	XCC0533	ISxcd1 transposase	+					XC_0545	abs	abs	abs	abs
	XCC0534	ISxcd1 transposase	+					XC_0546	abs	abs	abs	abs
	XCC0535	IS1478 transposase	-					abs	XCV2716	XAC2423	abs	abs
	XCC0536	hypothetical protein	+					XC_3697	abs	abs	abs	abs
	XCC0537	hypothetical protein	-					XC_3696	XCV3784	abs	abs	abs
		Putative CUT locus (unknown substrate)
	XCC0671	hypothetical protein	+					XC_3562	XCV3657	XAC3533	XOO0858	abs
	XCC0672	transcriptional regulator	-					XC_3561	XCV3656	XAC3532	XOO0859	abs
	XCC0673	Nicotinamide mononucleotide transporter	-	pnuC				XC_3560	XCV3655	XAC3531	XOO0860	abs
	XCC0674	TBDR	-					XC_3559	XCV3654	XAC3529	XOO0861	abs	Psyr_3769, Pseudomonas syringae pv. syringae B728a	PA1910 (26/43)
	XCC0675	hypothetical protein	-					XC_3558	XCV3653	XAC3528	XOO0862	abs
	XCC0676	glycosyl transferase	+	gtrB	GT2			XC_3557	XCV3652	XAC3526	XOO0863	XF1637
	XCC0677	hypothetical protein	+					XC_3556	XCV3651	XAC3525	abs	abs
	XCC0678	hypothetical protein	+		GT2			XC_3555	XCV3650	XAC3524	abs	abs
	XCC0679	hypothetical protein	+					XC_3554	XCV3649	XAC3523	abs	abs
	XCC0680	hypothetical protein	+					XC_3553	XCV3648	XAC3522	abs	abs
	XCC0681	nicotinate phosphoribosyltransferase	+	pncB				XC_3552	XCV3647	XAC3521	abs	XF1097
	XCC0755	transcriptional regulator tetR/acrR family	+					XC_3478	XCV0859	XAC0807	XOO3795	abs
	XCC0756	hypothetical protein	+					XC_3477	XCV0860	XAC0808	abs	abs
	XCC0757	hypothetical protein	+					XC_3476	XCV0861	XAC0809	abs	abs
	XCC0758	hypothetical protein	+					XC_3475	XCV0862	abs	abs	abs
	XCC0759	TBDR	+	cirA				XC_3474	XCV0863	XAC0811	XOO3793	abs	GOX1188, Gluconobacter oxydans 621H
	XCC0760	phosphoanhydride phosphohydrolase	+	appA				XC_3473	XCV0864	XAC0812	XOO3792	abs	GOX1190
	XCC0761	methionine adenosyltransferase	-	metK				XC_3471	XCV0865	XAC0813	XOO3791	XF0392
	XCC0762	hypothetical protein	+					XC_3470	XCV0866	XAC0814	XOO3789	abs
		Fur regulated TBDR
	XCC0765	nucleoside transporter	-	yeiM				XC_3467	XCV0871	XAC0819	XOO3783	abs
	XCC0766	voltage-gated potassium channel beta subunit	+					XC_3466	XCV0873	XAC0821	XOO3782	XF0367
	XCC0767	hypothetical protein	+					XC_3464	XCV0874	XAC0822	XOO3781	abs
	XCC0768	TBDR	+	phuR		Fur-regulated		XC_3463	XCV0875	XAC0823	abs	abs	alr2153, Nostoc sp. PCC 7120	PA4710; PhuR (33/49)
	XCC0769	hypothetical protein	+					XC_3462	XCV0876	XAC0824	XOO3775	abs
	XCC0770	hypothetical protein	+					XC_3461	XCV0878	XAC0825 D	abs	abs
	XCC0771	hypothetical protein	-					abs	XCV0879	XAC0826	XOO3774	XF0449
	XCC0772	permease	-	nrtB				XC_3459	XCV0880	XAC0827	XOO3772	abs
	XCC0773	ABC transporter ATP-binding component	-	nrtCD				abs	XCV0881	XAC0828	XOO3770 D	XF0412
	XCC0774	ABC transporter substrate binding protein	-					XC_3457	XCV0882	XAC0829	XOO3768	abs
	XCC0942	ABC transporter sulfate permease	+	cysW				XC_3293	XCV1049	XAC1019	XOO3688	XF1346
	XCC0943	sulfate ABC transporter ATP-binding protein	+	cysA				XC_3292	XCV1050	XAC1020	XOO3686	XF1347
	XCC0944	hypothetical protein	+					XC_3291	XCV1051	XAC1021	XOO3685	abs
	XCC0945	threonine 3-dehydrogenase	-	tdh				XC_3290	XCV1052	XAC1022	XOO3684	abs
	XCC0946	TBDR	-	fecA				XC_3289	XCV1053	XAC1023	XOO3683	abs	Psyr_4483, Pseudomonas syringae pv. syringae B728a
	XCC0947	non-hemolytic phospholipase C	+					XC_3288	XCV1054	XAC1024	XOO3682	abs
	XCC0948	phosphoglycerate mutase	+	pgmA				XC_3287	XCV1057	XAC1028	XOO3680	XF1886
	XCC0949	hypothetical protein	+					XC_3286	abs	abs	abs	abs
	XCC0950	folylpolyglutamate synthase/dihydrofolate synthase	+	folC				XC_3285	XCV1058	XAC1029	XOO3679	XF1946
		CAZy associated TBDR
	XCC1033	aconitate hydratase 1	+	acnA				XC_3213	XCV1158	XAC1139	XOO0894	abs
	XCC1034	hypothetical protein	+					XC_3212	abs	XAC1140	abs	abs
	XCC1035	hypothetical protein	+					XC_3211	abs	XAC1141	XOO0895	abs
	XCC1036	hypothetical protein	+					XC_3210	XCV1160	XAC1142	XOO0896	XF1243
	XCC1037	TBDR	+	fyuA				XC_3209	XCV1161	XAC1143	XOO0897	abs	Sala_0027, Sphingopyxis alaskensis RB2256	PA2335 (27/43)
	XCC1038	inosine-uridine preferring nucleoside hydrolase	+					XC_3208	XCV1162	XAC1144	XOO0898	abs
	XCC1039	hypothetical protein	+					XC_3207	XCV1164	XAC1145	abs	XF1252
	XCC1040	hypothetical protein	-					XC_3206	XCV1177	abs	abs	abs
	XCC1041	Ps-TBDR	+	fecA		HrpX regulated		XC_3205	XCV1165	XAC1146	XOO0901	abs	CC1113, Caulobacter crescentus CB15
	XCC1042	glycerophosphodiester phosphodiesterase	+	glpQ				XC_3204	XCV1166	XAC1147	XOO0902	abs
	XCC1043	hypothetical protein	+					XC_3203	abs	abs	abs	abs
	XCC1044	bifunctional penicillin-binding protein 1C	+	pbpC	GT51			XC_3202	XCV1168	XAC1148	abs	XF2235
	XCC1045	bacterioferritin	-					XC_3201	XCV1169	XAC1149	XOO0907	abs
	XCC1046	peroxiredoxin	-					XC_3200	XCV1170	XAC1150	XOO0908	abs
	XCC1047	low molecular weight heat shock protein	+	hspA				XC_3199	XCV1172	XAC1151	XOO0909	XF2234
		Putative partial CUT locus, CAZy associated TBDR
	XCC1174	two-component system regulatory protein	+					XC_3069	XCV1322	XAC1272	abs	abs
	XCC1175	two-component system sensor protein	+					XC_3068	XCV1323	XAC1273	abs	abs
	XCC1176	histidine kinase/response regulator hybrid protein	+	cvgSY				XC_3067	XCV1324	XAC1274	abs	abs
	XCC1177	IS1480 transposase	+					abs	abs	abs	XOO4178	abs
	XCC1178	xylosidase/arabinosidase	-	xylB	GH43			XC_3064	XCV1325	XAC1275	XOO4422	abs
	XCC1179	Ps-TBDR	+	fyuA				XC_3063	XCV1326	XAC1276	abs	abs	CC1970, Caulobacter crescentus CB15	PA2335 (27/40)
	XCC1180	thioredoxin	-	trx				XC_3062	XCV1327	XAC1277	abs	abs
	XCC1181	hypothetical protein	-					XC_3061	XCV1328	XAC1278	abs	abs
	XCC1182	two-component system regulatory protein	-					XC_3060	XCV1329	XAC1279	abs	abs
	XCC1183	protein-glutamate methylesterase	-	cheB				XC_3059	XCV1330	XAC1280	abs	abs
	XCC1184	chemotaxis protein	-	cheR				XC_3058	XCV1331	XAC1281	abs	abs
	XCC1185	two-component system sensor protein	-					XC_3057	XCV1332	XAC1283	abs	abs
	XCC1186	two-component system sensor protein	+					XC_3056	XCV1333	XAC1282	abs	abs
	XCC1187	two-component system regulatory protein	+					XC_3055	XCV1334	XAC1284	abs	abs
		Putative partial CUT locus
	XCC1250	Beta-glucosidase	+	bglX	GH3			XC_2991	XCV3988	XAC3869	XOO4123	abs
	XCC1251	hypothetical protein	+		GH29; CBM32			XC_2990	XCV1357	XAC1306	XOO1835	abs
	XCC1252	hypothetical protein	+					XC_2989	XCV1358	XAC1307	XOO1836	abs
	XCC1253	hypothetical protein	-					XC_2988	abs	abs	abs	abs
	XCC1254	hypothetical protein	-					XC_2987	abs	abs	abs	abs
	XCC1255	IS1478 transposase	+					XC_2986	XCV2716	XAC2423	XOO1863	abs
	XCC1256	beta-galactosidase	-	bga	GH2			XC_2985	XCV1359	XAC1308	XOO1837-8 D	abs
	XCC1257	arabinogalactan endo-1,4-beta-galactosidase	-	galA	GH53			XC_2984	XCV1360	XAC1309	XOO1838 D	abs
	XCC1258	TBDR	-	btuB				XC_2983	XCV1361	XAC1310	XOO1839	abs	Sde_3880, Saccharophagus degradans 2-40
	XCC1259	transcriptional regulator	-					XC_2982	XCV1362	XAC1311	XOO1841	abs
	XCC1260	methylmalonate-semialdehyde dehydrogenase	+	mmsA				XC_2981	XCV1363	XAC1312	XOO1842	abs
	XCC1261	acyl-CoA dehydrogenase	+	fadE9				XC_2980	XCV1364	XAC1313	XOO1843	abs
	XCC1336	hypothetical protein	-					XC_2903	XCV1438	XAC1382	XOO1921	abs
	XCC1337	ferredoxin II	-	ydgM				XC_2902	XCV1439	XAC1384	XOO1922	XF0547
	XCC1338	phosphotransferase	-	cicA				XC_2901	XCV1440	XAC1385	XOO1923	abs
	XCC1339	methionyl-tRNA synthetase	-	metS				XC_2900	XCV1441	XAC1386	XOO1924	XF0549
	XCC1340	TBDR	-	btuB				XC_2899	abs	abs	abs	XF0550	GOX0945, Gluconobacter oxydans 621H	PA2070 (24/37)
	XCC1341	hypothetical protein	-					XC_2898	XCV1442	XAC1387	XOO1925	abs
	XCC1342	glyoxylase I family protein	-					XC_2897	XCV1445	XAC1390	XOO1927	abs
	XCC1343	S-methylmethionine permease	+	ykfD				XC_2895	XCV1448	XAC1391	XOO1929	abs
	XCC1344	homocysteine S-methyltransferase	+	mmuM				XC_2894	XCV1449	XAC1392	XOO1930	abs
		Fur regulated TBDR
	XCC1389	hypothetical protein	-					XC_2850	abs	abs	abs	abs
	XCC1388	asparagine synthase B	+	asnB				XC_2848	XCV1490	XAC1433	XOO1990	XF0118
	XCC1390	hypothetical protein	-					XC_2847	XCV1491	XAC1434	XOO1991	XF0119
	XCC1391	TBDR	-	fhuA		Fur-regulated		XC_2846	XCV1493	XAC1435	XOO1992	abs	PSHAb0279, Pseudoalteromonas haloplanktis TAC125	PA2466 (27/43)
	XCC1392	penicillin acylase II	-	acyII				XC_2845	XCV1494	XAC1437	XOO1993	abs
	XCC1393	bacterioferritin	+	brf				XC_2844	XCV1495	XAC1438	XOO1994	abs	PSHAb0284
	XCC1394	thiopurine methyltransferase	-	tpmT				XC_2843	XCV1496	XAC1439	XOO1995 D	abs
	XCC1715	tRNA delta(2)-isopentenylpyrophosphate transferase	+	miaA				XC_2516	XCV1767	XAC1734	XOO2947	XF0090
	XCC1716	host factor-I protein	+	hfq				XC_2515	XCV1768	XAC1735	XOO2946	XF0089
	XCC1717	GTP-binding protein	+	hflX				XC_2514	XCV1769	XAC1736	XOO2945	XF0088
	XCC1718	hypothetical protein	+					XC_2513	XCV1770	XAC1737	XOO2944	XF0086
	XCC1719	TBDR	+			HrpX regulated		XC_2512	abs	abs	abs	abs	CC3336, Caulobacter crescentus CB15	PA2335 (29/43); PA0192 (28/41)
	XCC1720	ubiquinone biosynthesis protein	+	aarF				XC_2511	XCV1771	XAC1738	XOO2943	abs
	XCC1721	LexA repressor	+	lexA				XC_2510	XCV1772	XAC1739	XOO2942	XF0122
	XCC1722	RecA protein	+	recA				XC_2509	XCV1773	XAC1740	XOO2941	XF0123
	XCC1723	RecX protein	+	recX				XC_2508	XCV1774	XAC1741	XOO2940	abs
	XCC1724	alanyl-tRNA synthetase	+	alaS				XC_2507	XCV1775	XAC1742	XOO2939	XF0124
	XCC1725	carbon storage regulator	+	csrA				XC_2506	XCV1776	XAC1743	XOO2938	XF0125
	XCC1726	tRNA	+					XC_4359_tRNA	XCV0024_tRNA	XAC1744_tRNA	XOO4650_tRNA	XFt05_tRNA
		Putative CUT locus (pectin/polygalacturonate?)
	XCC1744	2-oxo-3-deoxygalactonate kinase	-	dgoK				XC_2490	XCV1794	XAC1763	XOO2920	abs
	XCC1745	regucalcin	-					XC_2489	XCV1795	XAC1764	XOO2918	abs
	XCC1746	4-hydroxy-2-oxoglutarate aldolase/2-deydro-3-deoxyphosphogluconate aldolase	-	dgoA				XC_2488	XCV1796	XAC1765	XOO2919	abs
	XCC1747	4-hydroxy-2-oxoglutarate aldolase/2-deydro-3-deoxyphosphogluconate aldolase	-	dgoA				XC_2487	XCV1797	XAC1766	XOO2917	abs
	XCC1748	galactose-binding protein regulator	+	gbpR				XC_2486	XCV1798	XAC1767	XOO2916	abs
	XCC1749	TBDR	+			PGA/Arabinose induced		XC_2485	XCV1799 D	XAC1768	abs	abs	CC2804, Caulobacter crescentus CB15
	XCC1750	Ps-TBDR	+			PGA/Arabinose induced		XC_2484	XCV1801	XAC1769	abs	abs	Sde_2502, Saccharophagus degradans 2-40
	XCC1751		+			PGA induced		XC_2484	XCV1801	XAC1769	abs	abs
	XCC1752	cellulase	+		GH74			XC_2483	XCV1802	XAC1770	abs	abs
	XCC1753	sialic acid-specific 9-O-acetylesterase	+					XC_2482	XCV1803	XAC1771	abs	abs	Sde_2492
	XCC1754	hypothetical protein	+		GH35			XC_2481	XCV1804	XAC1772	abs	abs	Sde_2501
	XCC1755	alpha-xylosidase	+	xylS	GH31			XC_2480	XCV1805	XAC1773	XOO2914	abs	Sde_2500
	XCC1756	hypothetical protein	+		GH95			XC_2479	XCV1806	XAC1774	XOO2913	abs	Sde_2503
	XCC1757	D-xylulokinase	+					XC_2478	XCV1807	XAC1775	XOO2911	abs
	XCC1758	xylose isomerase	+	xylA				XC_2477	XCV1808	XAC1776	XOO2910	abs	Sde_2504
	XCC1759	MFS transporter	+	xylE				XC_2476	XCV1809	XAC1777	XOO2909	abs
	XCC1760	sensor kinase	+					XC_2475	XCV1810	XAC1778	abs	abs
		Arabinose induced TBDR
	XCC1889	chromosome partioning protein	-	parA				XC_2299	XCV1960	XAC1907	XOO2832	abs
	XCC1890	MotB protein	-	motB				XC_2298	XCV1961	XAC1908	XOO2831	abs
	XCC1891	MotA protein	-	motA				XC_2297	XCV1962	XAC1909	XOO2830	abs
	XCC1892	TBDR	+	cirA		Arabinose induced		XC_2296	XCV1963	XAC1910	XOO2826	abs	PSHAb0165, Pseudoalteromonas haloplanktis TAC125
	XCC1893	hypothetical protein	+					abs	abs	abs	abs	abs
	XCC1894	hypothetical protein	+					abs	abs	abs	abs	abs
	XCC1895	hypothetical protein	-					abs	abs	abs	abs	abs
	XCC1987	GTP-binding protein	+	engA				XC_2197	XCV2072	XAC2021	XOO2529	XF0465
	XCC1988	molybdopterin biosynthesis	+	moeA				XC_2196	XCV2073	XAC2022	XOO2528	abs
	XCC1989	molybdopterin biosynthesis protein	-	moeB				XC_2195	XCV2074	XAC2023	XOO2514	XF0466
	XCC1990	Ps-TBDR	+	cirA				XC_2194	XCV2075	XAC2024	abs	abs	Rfer_3396, Rhodoferax ferrireducens T118
	XCC1991	hypothetical protein	+					XC_2193	XCV2076	XAC2025	abs	abs
	XCC1992	glucose 1-dehydrogenase homolog	-	yxnA				XC_2192	abs	abs	abs	abs
	XCC1993	fatty acid alpha hydroxylase	+	cypC				XC_2191	abs	abs	abs	abs
	XCC1994	hypothetical protein	+					XC_2190	XCV2077	XAC2026	abs	abs
	XCC2043	hypothetical protein	-					XC_2140	abs	abs	abs	abs
	XCC2044	hypothetical protein	-					XC_2139	abs	abs	abs	abs
	XCC2045	hypothetical protein	-					XC_2138	abs	XAC2134	abs	abs
	XCC2046	Ps-TBDR	+	fecA				XC_2137	XCV0751	XAC0690	abs	abs	PP_3340, Pseudomonas putida KT2440	PA2289 (22/39)
	XCC2047	chemotaxis protein	-	tsr				XC_2136	XCV1702	XAC1666	abs	abs
	XCC2048	hypothetical protein	+					XC_2135	abs	abs	abs	abs
	XCC2049	hypothetical protein	-					XC_2134	abs	abs	XOO3309	abs
		Putative partial CUT locus, conserved locus
	XCC2203	hypothetical protein	-					XC_1915	XCV2505	XAC2307	XOO2173	XF2445
	XCC2204	ABC transporter sugar permease	-	lacG				XC_1914	XCV2506	XAC2308	XOO2172	XF2446	Sala_1021
	XCC2205	ABC transporter sugar permease	-	lacF				XC_1913	XCV2507	XAC2309	XOO2171	XF2447	Sala_1022
	XCC2206	ABC transporter sugar binding protein	-	malE				XC_1912	XCV2508	XAC2310	XOO2170	XF2448	Sala_1023
	XCC2207	hypothetical protein	-					XC_1911	XCV2509	XAC2311	XOO2169	XF2449	Sala_1016
	XCC2208	Ps-TBDR/oar	-					XC_1910	XCV2510	XAC2312	XOO2166	abs	Sala_1015, Sphingopyxis alaskensis RB2256
	XCC2209	transcriptional regulator lacI family	-					XC_1909	XCV2511	XAC2313	XOO2165	abs	Sala_1024
	XCC2210	hypothetical protein	-					XC_1908	XCV2513	XAC2314	abs	XF2450
	XCC2211	hypothetical protein	-					XC_1907	XCV2514	XAC2315	XOO2164	abs
		Putative partial CUT locus, CAZy associated TBDR
	XCC2380	transcriptional regulator asnC/lrp family	-					XC_1734	XCV2697	XAC2515	XOO2486	abs
	XCC2381	L-lysine 6-aminotransferase	+					XC_1733	XCV2698	XAC2516	XOO2487	abs
	XCC2382	hypothetical protein	-					XC_1732	XCV2699	XAC2517	XOO2488	abs
	XCC2383	hypothetical protein	-					XC_1731	XCV2700	XAC2518	XOO2497	abs
	XCC2384	hypothetical protein	-					XC_1730	XCV2701	XAC2519	XOO2499	abs
	XCC2385	Ps-TBDR	-	cirA				XC_1729	XCV2702	XAC2520	XOO2500	abs	PSHAa0437, Pseudoalteromonas haloplanktis TAC125
	XCC2386	putative UMP pyrophosphorylase	+	upp				XC_1728	XCV2703	XAC2521	XOO2501	abs
	XCC2387	cellulase	-	egl2	GH9			XC_1727	XCV2704	XAC2522	abs	abs
	XCC2388	gamma-glutamyltranspeptidase	-	ggt				XC_1726	XCV2706	XAC2523	XOO2505	XF0984
	XCC2389	ferredoxin	-					XC_1725	XCV2707	XAC2524	XOO2506	XF0983
	XCC2390	hypothetical protein	-					XC_1724	XCV2708	XAC2525	XOO2507	XF0981
		CAZy associated TBDR
	XCC2391	lipopolysaccharide synthesis enzyme	-	kdtB				XC_1723	XCV2709	XAC2526	XOO2508	XF0980
	XCC2392	hypothetical protein	-					XC_1722	XCV2710	XAC2527	XOO2509	XF0979
	XCC2393	heat shock protein G	+	htpG				XC_1721	XCV2711	XAC2528	XOO2510	XF0978
	XCC2394	hypothetical protein	-					XC_1718	XCV2724	XAC2530	XOO3112	abs
	XCC2395	TBDR	-	btuB				XC_1717	XCV2725	XAC2531	abs	abs	Sden_2427, Shewanella denitrificans OS217	PA2070 (27/44)
	XCC2396	avirulence protein	-	avrXccA2				XC_1716	abs	abs	abs	abs
	XCC2397	peptidase	-					XC_1715	XCV2726	XAC2532	XOO3120	abs
	XCC2398	xylosidase/arabinosidase	-	xsa	GH43			XC_1714	XCV2728	XAC2533	XOO3121	abs
	XCC2399	hypothetical protein	-					XC_1713	XCV2729	XAC2534	XOO3122	abs
	XCC2400	TBDR	-	btuB				XC_1712	XCV2730	XAC2535	XOO3123	abs	CC1623, Caulobacter crescentus CB15	PA2070 (27/43)
	XCC2401	hypothetical protein	-					XC_1711	XCV2732	XAC2536	XOO3124	abs
	XCC2402	hypothetical protein	+					XC_1710	abs	XAC2538 D	abs	abs
	XCC2403	hypothetical protein	-					XC_1709	XCV2735	XAC2539	XOO3126	abs
		Putative CUT locus (starch/maltodextrin?)
	XCC2464	maltose transport gene repressor	+					XC_1649	XCV2796	XAC2595	abs	abs	CC2284
	XCC2465	cyclomaltodextrin glucanotransferase (CGTase)	-		GH13			XC_1648	XCV2797	XAC2596	abs	abs	CC2286
	XCC2466	transport protein	-	suc1				XC_1647	XCV2798	XAC2597	abs	abs	CC2283
	XCC2467	hypothetical protein	-					XC_1646	XCV2799	XAC2598	abs	abs
	XCC2468	alpha-glucosidase	+	algA	GH97			XC_1645	XCV2800	XAC2599	abs	abs
	XCC2469	TBDR, MalA	+	btuB		Maltose induced		XC_1644	XCV2801	XAC2600	abs	abs	CC2287, Caulobacter crescentus CB15
	XCC2470	IS1479 transposase	-					XC_1643	abs	abs	abs	abs
	XCC2471	alpha-glucosidase	-	algA	GH13			XC_1642	XCV2803	XAC2602	abs	abs	CC2285
	XCC2472	ISD1 transposase	+					abs	abs	abs	abs	abs
	XCC2473	ISD1 transposase	+					XC_1640	abs	abs	abs	abs
	XCC2474	VirB4 protein	-	virB4				XC_1639	abs	XAC2614	abs	abs
	XCC2494	pre-pilin leader sequence	-	pilV				XC_1622	XCV2820	abs	XOO3201	no XF0474
	XCC2495	pre-pilin like leader sequence	-	fimT				XC_1621	XCV2821	abs	XOO3202	no XF0473
	XCC2496	hypothetical protein	-					XC_1620	XCV2822	XAC2671	XOO3203	XF0472
	XCC2497	Ps-TBDR/oar	-	oar				XC_1619	XCV2823	XAC2672	XOO3204	abs	PSHAb0340, Pseudoalteromonas haloplanktis TAC125
	XCC2498	hypothetical protein	-					XC_1618	XCV2824	XAC2674	XOO3205	XF2666
	XCC2499	short chain dehydrogenase	-					XC_1617	XCV2825	XAC2675	XOO3206	abs
	XCC2500	hypothetical protein	-					XC_1616	XCV2826	XAC2676	XOO3207	XF2669
	XCC2569	hypothetical protein	+					XC_1549	XCV2891	XAC2739	XOO3277	abs
	XCC2570	deoxycytidine triphosphate deaminase	-	dcd				XC_1548	XCV2892	XAC2740	XOO3278	XF0762
	XCC2571	hypothetical protein	-					XC_1547	XCV2893	XAC2741	XOO3279	XF2301
	XCC2572	TBDR	+	btuB				XC_1546	XCV2894	XAC2742	abs	abs	Shewmr4_0124, Shewanella sp. MR-4	PA2070 (27/42)
	XCC2573	Ps-TBDR/oar	+	oar				XC_1545	XCV2896	XAC2743	XOO3320	abs	Patl_1148, Pseudoalteromonas atlantica T6c
	XCC2574	metallopeptidase	+					XC_1544	XCV2898	XAC2745	abs	XF0576
	XCC2575	metallopeptidase	+					XC_1543	XCV2899	XAC2746	abs	abs
	XCC2576	metallopeptidase	+					XC_1542	XCV2900	XAC2747	XOO3281	abs
	XCC2577	integral membrane protein	-					XC_1541	XCV2901	XAC2748	XOO3282	XF0649
	XCC2578	methylated-DNA-protein-cysteine S-methyltransferase related protein	-					XC_1540	XCV2902	XAC2749	XOO3283	abs
	XCC2579	reductase	-					XC_1539	XCV2903	XAC2750	XOO3286-87	abs
	XCC2580	D-amino acid dehydrogenase subunit	-	dadA				XC_1538	XCV2904	XAC2751	XOO3288	abs
	XCC2581	transport protein	-	yxaH				XC_1537	XCV2905	XAC2752	XOO3289	XF0651
	XCC2582	peptidyl-prolyl cis-trans isomerase	-	slyD				XC_1536	XCV2906	XAC2754	XOO3290	XF0652
	XCC2583	lipoprotein	+					XC_1535	XCV2907	XAC2753	XOO3291	XF0653
	XCC2655	chloride channel	+	yadQ				XC_1462	XCV2986	XAC2825	XOO1536	abs
	XCC2656	hypothetical protein	-					XC_1461 D	XCV2987 D	XAC2827	XOO1534	XF0382
	XCC2657	hypothetical protein	-					XC_1460	XCV2988	XAC2828	XOO1533	XF0383
	XCC2658	TBDR	+	phuR				XC_1459	XCV2989	XAC2829	XOO1531	XF0384	Mfla_0134, Methylobacillus flagellatus KT	PA0781 (36/52)
	XCC2659	transcriptional regulator	+					XC_1457	abs	abs	abs	abs
	XCC2660	transmembrane transport protein	+					XC_1456	abs	abs	abs	abs
	XCC2661	cytochrome D oxidase subunit B	-	qxtB				XC_1455	abs	abs	abs	abs
	XCC2662	cytochrome D oxidase subunit A	-	qxtA				XC_1454	abs	abs	abs	abs
	XCC2663	hypothetical protein	-					XC_1453	abs	abs	abs	abs
	XCC2664	formate dehydrogenase related protein	-					XC_1452	abs	abs	abs	abs
	XCC2665	TBDR	+	fhuA				XC_1451	XCV2991	XAC2830	XOO1530	abs	Sala_0305, Sphingopyxis alaskensis RB2256
	XCC2666	extracellular serine protease	+					XC_1450	XCV2993	XAC2831	abs	abs
	XCC2667	extracellular serine protease	+					XC_1449	XCV2993 D	XAC2831	abs	abs
	XCC2668	hypothetical protein	+					XC_1448	XCV2994	XAC2832	abs	abs
	XCC2669	extracellular serine protease	+					XC_1447	XCV2993 D	XAC2831	abs	abs
	XCC2670	oxidoreductase	-	mocA				XC_1446	abs	abs	abs	abs
	XCC2671	oxidoreductase	-	mocA				XC_1445	XCV2995 D	XAC2835	abs	abs
	XCC2672	MFS transporter	-					XC_1444	XCV2996	XAC2837	abs	abs
	XCC2673	transcriptional regulator lysR family	+					XC_1443	XCV2997	XAC2838	abs	abs
		Fur regulated TBDR
	XCC2766	ABC transporter permease	+	ynhE				XC_1347	XCV3079	XAC2935	XOO1405	XF1476
	XCC2767	ABC transporter ATP-binding protein	+	ynhD				XC_1346	XCV3080	XAC2936	XOO1404	XF1475
	XCC2768	ABC transporter permease	+	ynhC				XC_1345	XCV3081	XAC2937	XOO1403	XF1474
	XCC2769	cysteine desulfurase	+	nifS				XC_1344	XCV3082	XAC2938	XOO1402	XF1473
	XCC2770	acetyltransferase	+					XC_1343	XCV3083	XAC2939	XOO1401	abs
	XCC2771	benzene 1,2-dioxygenase, ferredoxin protein	+	bedB				XC_1342	XCV3084	XAC2940	XOO1400	XF1472
	XCC2772	TBDR	+	fhuA		Fur-regulated		XC_1341	XCV3085	XAC2941	abs	XF0599	PA1322, Pseudomonas aeruginosa PAO1	PA4514; PiuA (35/50)
	XCC2773	hypothetical protein	+					XC_1340	XCV3086	XAC2942	abs	abs
	XCC2774	hypothetical protein	+					XC_1339	XCV3087	XAC2943	abs	abs
	XCC2775	hypothetical protein	+					XC_1338	XCV3088	XAC2944	abs	XF0597
		Putative partial CUT locus, conserved locus
	XCC2824	hypothetical protein	+					XC_1288	XCV3142	XAC2993	XOO1265	abs
	XCC2825	tryptophan halogenase	-	prnA				XC_1287	XCV3144	XAC2995	XOO1263	abs	Patl_3277
	XCC2826	hypothetical protein	-					XC_1286	XCV3145	XAC2996	XOO1262	abs	Patl_4288
	XCC2827	hypothetical protein	-					XC_1285	XCV3146	XAC2997	XOO1261	abs	Patl_4287
	XCC2828	TBDR	-	fecA		Arabinose/xylan/xylose induced		XC_1284	XCV3147	XAC2998	XOO1260	abs	Patl_3278 / Patl_4286, Pseudoalteromonas atlantica T6c
	XCC2829	peptidase	-					XC_1282	XCV3148	XAC2999	XOO1259-8	abs
	XCC2830	hypothetical protein	-					XC_1281	XCV3148 D	XAC2999	XOO1258	abs	Patl_4270
	XCC2831	transcriptional regulator soxR family	-	soxR				XC_1280	XCV3149	XAC3000	XOO1257	abs
	XCC2832	MFS transporter	+					XC_1279	XCV3150	XAC3001	XOO1255-4-3	abs
		CAZy associated TBDR
	XCC2863	glucosyl transferase	-	gtrB	GT2			XC_1245	XCV3183	XAC3046	abs	XF0176
	XCC2864	monofunctional biosynthetic peptidoglycan transglycosylase	-	mtgA	GT51			XC_1244	XCV3184	XAC3047	XOO1808	XF1715
	XCC2865	heat shock protein	+					XC_1243	XCV3185	XAC3048	XOO1807	XF1714-13
	XCC2866	hypothetical protein	+					XC_1242	XCV3186	XAC3049	XOO1806	XF1712
	XCC2867	TBDR	+	btuB				XC_1241	XCV3187	XAC3050	XOO1805	abs	SO1822, Shewanella oneidensis MR-1	PA2070 (29/45)
	XCC2868	transcriptional regulator	-					XC_1240	XCV3188	XAC3052	XOO1804	abs
	XCC2869	hypothetical protein	+					XC_1239	XCV3189	XAC3053	XOO1803	abs
	XCC2870	acyl-CoA dehydrogenase	+					XC_1238	XCV3190	XAC3054	XOO1802	abs
		Putative partial CUT locus, CAZy associated TBDR, conserved locus
	XCC2883	ADP compounds hydrolase	-	nudE				XC_1226	XCV3201	XAC3067	XOO1789	XF0188
	XCC2884	adenosylmethionine-8-amino-7-oxononanoate aminotransferase	+	bioA				XC_1225	XCV3202	XAC3068	XOO1787	XF0189
	XCC2885	hypothetical protein	+					XC_1224	XCV3203	XAC3069	XOO1786	XF0190
	XCC2886	glucose kinase	-	glk				XC_1223	XCV3204	XAC3070	XOO1785	abs
	XCC2887	TBDR	+	iroN				XC_1222	XCV3206	XAC3071	XOO1784	XF2713	Saro_2410, Novosphingobium aromaticivorans DSM 12444
	XCC2888	alpha-L-fucosidase	+	fucA1	GH29			XC_1221	XCV3207	XAC3072	XOO1783	XF2714	Saro_2423
	XCC2889	hypothetical protein	+					XC_1220	XCV3208	XAC3073	XOO1782	XF0848
	XCC2890	beta-hexosaminidase	+	nahA	GH20			XC_1219	XCV3209	XAC3074	XOO1781	XF0847	Saro_2417
	XCC2891	beta-hexosaminidase	+		GH2			XC_1218	XCV3210	XAC3075	XOO1780	XF0846	Saro_2418
	XCC2892	glucan 1,4-beta-glucosidase	+		GH3			XC_1217	XCV3211	XAC3076	XOO1779	XF0845	Saro_2419
	XCC2893	hypothetical protein	+					XC_1216	XCV3212	XAC3082	XOO1771	XF0843	Saro_2420
	XCC2894	hypothetical protein	+		GH92			XC_1215	XCV3213	XAC3083	XOO1770	XF0842	Saro_2421
	XCC2895	beta-galactosidase	+	bga	GH35			XC_1214	XCV3214	XAC3084	XOO1769	XF0840
	XCC2896	virulence protein	-	psvA				XC_1213	XCV0437	abs	abs	abs
	XCC2897	ISxac3 transposase	-					XC_1212	XCV0024 D	abs	XOO2820	abs
	XCC2941	hypothetical protein	+					XC_1168	XCV3249	XAC3118	XOO1732	abs
	XCC2942	hypothetical protein	+					XC_1167	XCV3250	XAC3119	XOO1731	XF1384
	XCC2943	glucose kinase	+	glk				XC_1166	XCV3251	XAC3120	XOO1785	abs
	XCC2944	TBDR	+	fepA				XC_1165	XCV3252	XAC3121	XOO1727	abs	CC0446, Caulobacter crescentus CB15
	XCC2945	ATP dependent RNA helicase	-	hrpA				XC_1164	XCV3253	XAC3122	XOO1725	XF1383
	XCC2946	DNA-binding related protein	+					XC_1163	XCV3254	XAC3123	XOO1724	XF1382
	XCC2947	DNA helicase	+	recQ				XC_1162	XCV3255	XAC3124	XOO1723	XF1381
		Putative CUT locus (unknown substrate)
	XCC3033	hypothetical protein	-					XC_1125	XCV3288	XAC3156	XOO1654	abs
	XCC3034	transmembrane transport protein	+					XC_1124	XCV3289	XAC3157	XOO1653	abs
	XCC3035	alpha,alpha-trehalose-phosphate synthase	+		GT20			XC_1123	abs	abs	abs	abs
	XCC3036	Ps-TBDR	+	fhuA				XC_1122	XCV3290	XAC3158	abs	abs	IL2594, Idiomarina loihiensis L2TR
	XCC3037	phospholipase C	+	plcN				XC_1121	XCV3291	XAC3160	XOO1651	abs
	XCC3038	xylanase	-	xynB	CE10			XC_1120	XCV3292	abs	XOO1371	abs
	XCC3039	beta lactamase	-	bla				XC_1119	XCV3293	XAC3162	XOO1370	abs
	XCC3040	transcriptional activator ampR family	+	ampR				XC_1118	XCV3294	XAC3163	XOO1369	abs
	XCC3040	transcriptional activator ampR family	+	ampR				XC_1118	XCV3294	XAC3163	XOO1369	abs
	XCC3041	hypothetical protein	-					XC_1117	XCV3295	XAC3164	XOO1368	abs
	XCC3042	ABC transporter ATP-binding protein	-	yheS				XC_1116	XCV3296	XAC3165	XOO1367	XF2133
	XCC3043	TBDR	+	bfeA				XC_1115	XCV3297	XAC3166	XOO1366	XF2134	Psyr_2290, Pseudomonas syringae pv. syringae B728a	PA2590 (39/54); PA2089 (38/54)
	XCC3044	hypothetical protein	+					XC_1114	XCV3298	XAC3167	XOO1365	abs
	XCC3045	TBDR	+	bfeA				XC_1113	XCV3299	XAC3168	XOO1364	XF2137	Psyr_2290, Pseudomonas syringae pv. syringae B728a	PA2590 (35/51); PA2089 (35/50)
	XCC3046	TBDR	+	bfeA				XC_1112	XCV3301	XAC3169	XOO1363	abs	Shewmr7_0415, Shewanella sp. MR-7	PA2590 (35/52); PA2089 (35/50)
	XCC3047	cytochrome P450 hydroxylase	-	bioI				XC_1111	XCV3302	XAC3170	abs	abs
	XCC3048	cation:proton antiporter	+	ybaL				XC_1110	XCV3304	XAC3171	XOO1362	XF2140
	XCC3049	4-hydroxy-2-oxovalerate aldolase	+	mphE				XC_1109	XCV3305	XAC3175	XOO1360	abs
		Fur regulated TBDR, conserved locus
	XCC3047	cytochrome P450 hydroxylase	-	bioI				XC_1111	XCV3302	XAC3170	abs	abs
	XCC3048	cation:proton antiporter	+	ybaL				XC_1110	XCV3304	XAC3171	XOO1362	XF2140
	XCC3049	4-hydroxy-2-oxovalerate aldolase	+	mphE				XC_1109	XCV3305	XAC3175	XOO1360	abs
	XCC3050	TBDR	+	fecA		Fur-regulated		XC_1108	XCV3306	XAC3176	XOO1359	abs	VPA1656 (PvuA), Vibrio parahaemolyticus RIMD 2210633	PA3901 (31/48)
	XCC3051	hypothetical protein	+					XC_1107	XCV3307	XAC3177	XOO1358	abs	VPA1658 (PvsA)
	XCC3052	hypothetical protein	+					XC_1106	XCV3308	XAC3178	XOO1357	abs	VPA1659 (PvsB)
	XCC3053	transport protein	+	yceE				XC_1105	XCV3309	XAC3179	XOO1356	abs	VPA1660 (PvsC)
	XCC3054	iron transporter	+	iucA				XC_1104	XCV3310	XAC3180	XOO1355	abs	VPA1661 (PvsD)
	XCC3055	diaminopimelate decarboxylase	+	lysA				XC_1103	XCV3311	XAC3181	XOO1354	abs	VPA1662 (PvsE)
	XCC3056	transcriptional regulator araC family	-					XC_1102	XCV3312	abs	abs	abs
		Putative Cobalamin locus
	XCC3057	cobalamin synthase	-	cobS				XC_1101	XCV3313	XAC3184	XOO1353	abs	PaerPA_01001759 / PaerP_01003967
	XCC3058	conserved hypothetical protein	-					XC_1100	XCV3314	XAC3185	XOO1352	abs	PaerPA_01001758 / PaerP_01003966
	XCC3059	nicotinate-nucleotide-dimethylbenzimidazole phosphoribosyltransferase	-	cobT				XC_1099	XCV3315	XAC3186	XOO1351	abs	PaerPA_01001757 / PaerP_01003965
	XCC3060	adenosyl cobinamide kinase/adenosyl cobinamide phosphate guanylyltransferase	-	cobU				XC_1098	XCV3316	XAC3187	XOO1350	abs	PaerPA_01001756 / PaerP_01003964
	XCC3061	cobyric acid synthase	-					XC_1097	XCV3317	XAC3188	XOO1350 D	abs	PaerPA_01001755 / PaerP_01003963
	XCC3062	cobalamin biosynthesis protein	-	cobD				XC_1096	XCV3319	XAC3190	XOO1350 D	abs	PaerPA_01001753 / PaerP_01003961
	XCC3063	cobyrinic acid a,c-diamide synthase	-	cobB				XC_1095	abs	abs	abs	abs	PaerPA_01001751 / PaerP_01003959
	XCC3064	cob(I)alamin adenolsyltransferase	-	btuR				XC_1094	XCV3320	XAC3191	XOO1349	abs	- / PaerP_01003958
	XCC3065	conserved hypothetical protein	-					XC_1093	XCV3321	XAC3192	XOO1348	abs
	XCC3066	hypothetical protein	-					XC_1092	XCV3322	XAC3193	XOO1347	abs
	XCC3067	Ps-TBDR	-	btuB				XC_1091	XCV3323	XAC3194	XOO1345	abs	PaerPA_01001749, strain PACS2 / PaerP_01003957, strain PA7	PA1271 (51/65)
	XCC3068	homocysteine synthase PA5025	-	metB				XC_1090	abs	abs	abs	abs
	XCC3069	hypothetical protein	-					XC_1089	abs	abs	XOO1338	abs
	XCC3070	ATP-dependent Clp protease subunit	-	clpB				XC_1088	XCV3324	XAC3195	XOO1337	XF0381
	XCC3071	ABC transporter ATP-binding subunit	-					XC_1087	XCV3325 D	XAC3196	abs	abs
	XCC3072	hypothetical protein	+					XC_1086	XCV3326	XAC3202	XOO1336	abs
	XCC3073	glutathione transferase	+					XC_1085	XCV3327	XAC3203	XOO1335 D	abs
	XCC3074	hypothetical protein	-					XC_1084	XCV3328	XAC3204	abs	abs
		CAZy associated TBDR
	XCC3076	hypothetical protein	-					XC_1082	XCV3330	XAC3206	XOO1607	abs
	XCC3077	hypothetical protein	-					XC_1081	XCV3331	XAC3208	abs	abs
	XCC3078	hypothetical protein	-					XC_1080	XCV3332	abs	XOO1605	abs	Pfl_2344
	XCC3079	TBDR	+	bfeA				XC_1079	XCV3333	XAC3207	XOO1604	abs	Pfl_2342, Pseudomonas fluorescens PfO-1	PA2590 (35/48); PA2089 (35/47)
	XCC3080	trehalose-6-phosphate phosphatase	+	ostB				XC_1078	XCV3334	XAC3209	XOO1603	abs
	XCC3081	hypothetical protein	+		GH15			XC_1077	XCV3335	XAC3210	XOO1602	abs
	XCC3082	trehalose-6-phosphate synthase	+	ostA	GT20			XC_1076	XCV3336	XAC3211	XOO1601	abs
	XCC3083	glucose dehydrogenase	+					XC_1075	XCV3337	XAC3212	abs	abs
	XCC3084	chemotaxis protein	+	mcp1				XC_1074	XCV3338	XAC3213	abs	abs
		Putative partial CUT locus, CAZy associated TBDR
	XCC3157	aminopeptidase	+					XC_1008	XCV3425	XAC3309	abs	abs
	XCC3158	aminopeptidase	+					XC_1007	XCV3425 D	XAC3309	abs	abs
	XCC3159	transcriptional regulator lacI family	+	salR				XC_1006	XCV3427	XAC3310	abs	abs
	XCC3160	1,4-beta-cellobiosidase	-		GH6			XC_1005	abs	abs	XOO4035	XF1267
	XCC3161	TBDR	-	iroN				XC_1004	XCV3428	XAC3311	abs	abs	Sde_4006, Saccharophagus degradans 2-40
	XCC3162	glycosyl hydrolase	-		GH2			XC_1003	XCV3430	XAC3312	abs	abs
	XCC3163	alpha-glucosidase	+	susB	GH97			XC_1002	XCV3431	XAC3313	abs	abs
	XCC3164	carboxylesterase	-					XC_1001	XCV3433	XAC3315	XOO3386	abs
	XCC3171	ATP sulfurylase/adenylylsulfate kinase	-	nodQ				XC_0994	XCV3445	XAC3328	XOO3396	XF1501
	XCC3172	ATP sulfurylase small subunit	-	cysD				XC_0993	XCV3446	XAC3329	XOO3397	XF1500
	XCC3173	NADPH-sulfite reductase flavoprotein subunit	+	cysJ				XC_0992	XCV3447	XAC3330	XOO3398	XF1499
	XCC3174	NADPH-sulfite reductase iron-sulfur protein	+	cysI				XC_0991	XCV3448	XAC3331	XOO3400	XF1498
	XCC3175	3'-phosphoadenosine 5'-phosphosulfate reductase	+	cysH				XC_0990	XCV3449	XAC3332	XOO3401	XF1497
	XCC3176	hypothetical protein	-					XC_0989	XCV3450	XAC3333 D	XOO3402 D	abs
	XCC3177	TBDR	-	fecA				XC_0988	XCV3451	XAC3334	XOO3403	XF1496	PP_3340, Pseudomonas putida KT2440
	XCC3178	sensor histidine kinase	+					XC_0987	XCV3453	XAC3335	XOO3405	abs
	XCC3179	hypothetical protein	-					XC_0985	XCV3456	XAC3338	XOO3406	abs
	XCC3180	transcriptional regulator lysR family	-	cysB				XC_0984	XCV3457	XAC3339	XOO3407	XF0833
	XCC3181	siroheme synthase	+	cysG				XC_0983	XCV3458	XAC3340	XOO3408	XF0832
	XCC3182	cysteine synthase	+	cysK				XC_0982	XCV3459	XAC3341	XOO3409	XF0831
	XCC3205	TonB-like protein	-					XC_0915	XCV3479 D	XAC3362	XOO1191	abs
	XCC3206	transcriptional regulator blaI family	-	blaI				XC_0916	XCV3481	XAC3363	XOO1190	abs
	XCC3207	hypothetical protein	+					XC_0917	XCV3482	XAC3364	XOO1182	abs
	XCC3208	hypothetical protein	+					XC_0918	XCV3483	XAC3365	XOO1181	abs
	XCC3209	TBDR	+	cirA				XC_0919	XCV3485	XAC3366	XOO1180	abs	CC0563, Caulobacter crescentus CB15
	XCC3210	hypothetical protein	+					XC_0920	XCV3486	XAC3367	XOO1179	abs
	XCC3211	hypothetical protein	+					XC_0921	XCV3487	XAC3368	XOO1178	abs
	XCC3212	reductase	-					XC_0922	abs	abs	abs	abs
		Fur regulated TBDRs
	XCC3211	hypothetical protein	+					XC_0921	XCV3487	XAC3368	XOO1178	abs
	XCC3212	reductase	-					XC_0922	abs	abs	abs	abs
	XCC3213	transcriptional regulator	+					XC_0923	XCV3880	abs	abs	abs
	XCC3214	IS1478 transposase	-					abs	XCV2716	XAC2423	XOO1863	abs
	XCC3215	Ps-TBDR	-	fhuE		Fur-regulated		XC_0924	XCV3489	XAC3370	abs	abs	Csal_3182, Chromohalobacter salexigens DSM 3043	PA2398; FpvA (43/65)
	XCC3216		-			Fur-regulated		XC_0925	XCV3489	XAC3370	abs	abs	STM1204, Salmonella typhimurium LT2	PA2398; FpvA (43/65)
	XCC3217	IS1404 transposase	+					XC_0926	abs	abs	abs	abs
	XCC3218	IS1404 transposase	+					XC_0927	XCV0022 D	XAC3936	abs	abs
	XCC3219	proline imino-peptidase	+					XC_0928	abs	XAC3371	abs	abs
	XCC3220	transketolase 1	-	tktA				XC_0929	XCV3490	XAC3372	XOO1176	XF1936
	XCC3267	conserved hypothetical protein	+					XC_0897	XCV3530	XAC3413	XOO1125	XF1494
	XCC3268	rubredoxin	-	rubA				XC_0896	XCV3531	XAC3414	XOO1124	XF0379
	XCC3269	thiamin-phosphate pyrophosphorylase	+	thiE				XC_0895	XCV3532	XAC3415	XOO1123	XF0378
	XCC3270	Ps-TBDR/oar	-					XC_0894	XCV3534	XAC3418	XOO1233	abs	Patl_1148, Pseudoalteromonas atlantica T6c
	XCC3271		-					XC_0893	XCV3534	XAC3418	XOO1233	abs	Patl_1148, Pseudoalteromonas atlantica T6c
	XCC3272	glutamate-1-semialdehyde 2,1-aminomutase	+	hemL				XC_0892	XCV3535	XAC3420	XOO1232	XF2302
	XCC3273	transcriptional regulator	+	acoK				XC_0891	XCV3536	XAC3421	XOO1230	abs
	XCC3274	electron transfer protein azurin I	-	az1				XC_0890	XCV3537	XAC3422	XOO1229	XF0557
	XCC3276	TdcF protein	-	tdcF				XC_0888	XCV3539	XAC3424	XOO1226	abs
	XCC3277	cytochrome C6	-					XC_0887	XCV3540	XAC3425	XOO1225	abs
	XCC3278	flavin monoamine oxidase-related protein	-					XC_0886	XCV3541	XAC3426	XOO1223	abs
	XCC3279	Ps-TBDR	-	fhuA				XC_0885	XCV3542	XAC3427	XOO1222-1	abs	CC3436, Caulobacter crescentus CB15
	XCC3280	hypothetical protein	+					XC_0884	XCV3543	XAC3428	XOO1220	abs
	XCC3281	hypothetical protein	+					XC_0883	XCV3543	XAC3428	XOO1220	abs
	XCC3282	acetylornithine aminotransferase	-	argD				XC_0882	XCV3544	XAC3429	XOO1219	XF1427
	XCC3313	hypothetical protein	-					XC_0852	XCV3569	XAC3441	XOO0953	abs
	XCC3314	inorganic pyrophosphatase	+	ppa				XC_0851	XCV3570	XAC3442	XOO0952	XF2171
	XCC3315	response regulator	+					XC_0850	XCV3571	XAC3443	XOO0951	abs
	XCC3316	TBDR	-	btuB				XC_0849	XCV3572	XAC3444	XOO0950	abs	SO1822, Shewanella oneidensis MR-1	PA2070 (27/43)
	XCC3317	transcriptional regulator	-					XC_0848	XCV3573	XAC3445	XOO0949	abs
	XCC3318	hypothetical protein	-					XC_0847	XCV3574	XAC3446	XOO0948	abs
	XCC3319	thiamine biosynthesis protein	-	thiC				XC_0846	XCV3575	XAC3447	XOO0947	XF1888
		Sucrose utilization locus (sux locus)
	XCC3356	transcriptional regulator, SuxR	+	cebR		Sucrose induced		XC_0808	XCV3615	XAC3487	XOO1101	abs	CC1137
	XCC3357	sugar transporter, SuxC	-	suc1		Sucrose induced		XC_0807	XCV3616	XAC3488	XOO1100	abs
	XCC3358	TBDR, SuxA	+	fyuA		Sucrose induced		XC_0806	XCV3617	XAC3489	XOO1099	abs	CC1136, Caulobacter crescentus CB15
	XCC3359	amylosucrase or alpha amylase, SuxB	+		GH13	Sucrose induced		XC_0805	XCV3618	XAC3490	XOO1098	abs	CC1135
		CAZy associated TBDR
	XCC3402	high-affinity choline transport	+	betT				XC_0762	XCV0776	XAC0720	XOO3886 D	abs
	XCC3403	betaine aldehyde dehydrogenase	+	betB				XC_0761	XCV0775	XAC0719	abs	abs
	XCC3404	choline dehydrogenase	+	betA				XC_0760	XCV0774	XAC0718	abs	abs
	XCC3405	TBDR	-	btuB				XC_0759	XCV3685	XAC3560	abs	abs	SO1822, Shewanella oneidensis MR-1	PA2070 (27/42)
	XCC3406	soluble lytic murein transglycosylase	+	slt	GH23			XC_0758	XCV3686	XAC3561	XOO0820	XF1363
	XCC3407	tRNA nucleotidyltransferase	+	cca				XC_0757	XCV0773	XAC0717	XOO3900	XF1362
		Putative CUT locus (unknown substrate)
	XCC3407	tRNA nucleotidyltransferase	+	cca				XC_0757	XCV0773	XAC0717	XOO3900	XF1362
	XCC3408	Ps-TBDR	-	fyuA				XC_0756	XCV0772	XAC0716	XOO1784	abs	CC0446, Caulobacter crescentus CB15
	XCC3409	nisin-resistance protein	-					XC_0755	abs	abs	abs	abs
	XCC3410	N-acetylglucosamine-6-phosphate deacetylase	-	nagA	CE9			XC_0754	XCV0771	XAC0715	XOO3915	XF1465	CC0443
	XCC3411	glucosamine-fructose-6-phosphate aminotransferase	-	glmS				XC_0753	XCV0770	XAC0714	XOO3917	XF1464	CC0444
	XCC3412	transcriptional regulator lacI family	-					XC_0752	XCV0769	XAC0713	XOO3918	XF1463
	XCC3413	glucose/galactose transporter	-	gluP				XC_0751	XCV0768	XAC0712	XOO3919	XF1462
	XCC3414	transcriptional regulator gntR family	-					XC_0750	XCV0767	XAC0711	XOO3920	XF1461 D	CC0445
	XCC3415	type II secretion system protein N	-	xcsN				XC_0749	XCV0766	XAC0705	abs	abs
		Conserved locus
	XCC3415	type II secretion system protein N	-	xcsN				XC_0749	XCV0766	XAC0705	abs	abs	Sala_0325
	XCC3416	type II secretion system protein M	-	xcsM				XC_0748	XCV0765	XAC0704	abs	abs
	XCC3417	type II secretion system protein L	-	xcsL				XC_0747	XCV0764	XAC0703	abs	abs	Sala_0323
	XCC3418	type II secretion system protein K	-	xcsK				XC_0746	XCV0763	XAC0702	abs	abs	Sala_0322
	XCC3419	type II secretion system protein J	-	xcsJ				XC_0745	XCV0762	XAC0701	abs	abs	Sala_0321
	XCC3420	type II secretion system protein I	-	xcsI				XC_0744	XCV0761	XAC0700	abs	abs	Sala_0320
	XCC3421	type II secretion system protein H	-	xcsH				XC_0743	XCV0760	XAC0699	abs	abs	Sala_0319
	XCC3422	type II secretion system protein G	-	xcsG				XC_0742	XCV0759	XAC0698	XOO0849	XF1519	Sala_0318
	XCC3423	type II secretion system protein F	-	xcsF				XC_0741	XCV0758	XAC0697	XOO0848	XF1518	Sala_0317
	XCC3424	type II secretion system protein E	-	xcsE				XC_0740	XCV0757	XAC0696	XOO0847	XF1517	Sala_0316
	XCC3425	type II secretion system protein D	-	xcsD				XC_0739	XCV0756	XAC0695	abs	abs
	XCC3426	type II secretion system protein C	-	xcsC				XC_0738	XCV0755	XAC0694	abs	abs	Sala_0314
	XCC3427	TBDR	-	fecA				XC_0737	XCV0754	XAC0693	abs	abs	Sala_0313, Sphingopyxis alaskensis RB2256
	XCC3428	hypothetical protein	-					XC_0736	XCV0753	XAC0692	abs	abs	Sala_0312
	XCC3429	hypothetical protein	+					XC_0735	XCV0752	XAC0691	abs	abs
	XCC3430	hypothetical protein	-					XC_0734	XCV0750	XOO0689	abs	XF1459
		Putative partial CUT locus
	XCC3471	sugar kinase	+					XC_0690	XCV0716	XAC0655	XOO3971	abs
	XCC3472	transcriptional regulator	+	acoR				XC_0689	XCV0715	XAC0654	abs	abs
	XCC3473	IS1480 transposase	+					XC_0688	abs	abs	XOO3975	abs
	XCC3474	Ps-TBDR	-	fepA				XC_0687	XCV0714	XAC0653	abs	abs	H16_B1039, Ralstonia eutropha H16	PA2289 (22/39)
	XCC3475	alcohol dehydrogenase class III	-	adhC				XC_0686	XCV0713	XAC0652	XOO3867	abs
	XCC3476	surface antigen gene	-					XC_0685	XCV0712	XAC0651	abs	abs
	XCC3477	hypothetical protein	-					XC_0684	XCV0711	XAC0650	abs	abs
		Fur regulated TBDR
	XCC3515	periplasmic glucan biosynthesis protein	-	hrpM	GT2			XC_0645	XCV0675	XAC0618	XOO4011	XF1623
	XCC3516	sulfur deprivation response regulator	-	sac1				XC_0644	abs	abs	abs	abs
	XCC3517	aminopeptidase	-					XC_0643	XCV0673	XAC0615	XOO4015	XF0820
	XCC3518	TBDR	+	fpvA		Fur-regulated		XC_0642	abs	abs	abs	abs	Pfl_2583, Pseudomonas fluorescens PfO-1	PA2398; FpvA (38/55)
	XCC3519	GGDEF family protein	-					XC_0641	XCV0672	XAC0614	XOO4016-7	abs
	XCC3520	sulfate permease	-	ybaR				XC_0640	XCV0671	XAC0613	XOO4018	abs
	XCC3521	cellulase	+	engXCA	GH5; CBM2			XC_0639	XCV0670	XAC0612	XOO4019	XF0818
		Fur regulated TBDR
	XCC3592	hypothetical protein	-					XC_0555	XCV0578	XAC0549	XOO4275	abs
	XCC3593	RNA polymerase sigma factor	+	fecI				XC_0556	abs	abs	abs	abs	PFL_2291
	XCC3594	transmembrane sensor	+	fecR				XC_0557	abs	abs	abs	abs
	XCC3595	Ps-TBDR/transducer	+	pbuA		Fur-regulated		XC_0558	abs	abs	abs	abs	PFL_2293, Pseudomonas fluorescens Pf-5	PA4168; FpvB (35/51)
	XCC3596	hypothetical protein	+					XC_0559	abs	abs	abs	abs
	XCC3597	hypothetical protein	+					XC_0560	abs	abs	abs	abs
	XCC3598	hypothetical protein	+					XC_0561	abs	abs	abs	abs
	XCC3632	hypothetical protein	+					XC_3703	XCV3791	XAC3671	XOO0711	abs
	XCC3633	hypothetical protein	+					XC_3704	XCV3795	XAC3675	XOO0707	XF1204
	XCC3634	hypothetical protein	-					XC_3705	abs	abs	abs	abs
	XCC3635	TBDR	-					XC_3706	XCV4224	XAC4131	abs	abs	CC1131, Caulobacter crescentus CB15
	XCC3636	oxidoreductase	+					XC_3707	XCV3797	XAC3676	XOO0705	abs
	XCC3637	hydrolase	-					XC_3708	XCV3798	XAC3677	XOO0704	XF1201
	XCC3638	ribosomal small subunit pseudouridylate synthase	-					XC_3709	XCV3799	XAC3678	XOO0703	XF1200
		Conserved locus
	XCC3711	hypothetical protein	+					XC_3782	XCV3872	XAC3753	XOO0629	abs
	XCC3712	chemotaxis protein	+					XC_3783	XCV3873	abs	XOO0628	abs
	XCC3713	hypothetical protein	+					XC_3784	XCV3874	XAC3755	XOO0627	abs
	XCC3714	TBDR	-					XC_3785	XCV3875	XAC3756	XOO0626	abs	CC1517, Caulobacter crescentus CB15	PA4837 (36/53)
	XCC3715	hypothetical protein	-					XC_3786	XCV3876	XAC3757	XOO0625	abs	CC1520
	XCC3716	hypothetical protein	-					XC_3787	XCV3877	XAC3758	XOO0624	abs	CC1519
	XCC3717	ABC transporter ATP-binding protein	-	drrA				XC_3788	XCV3878	XAC3759	XOO0623	abs	CC1518
	XCC3718	hypothetical protein	+					XC_3789	XCV3879	XAC3760	abs	abs
	XCC3719	transcriptional regulator	-					XC_3790	XCV3880	XAC3761	abs	abs
		Conserved locus
	XCC3958	hypothetical protein	+					XC_4047	XCV4133	XAC4042	XOO0400	abs
	XCC3959	hypothetical protein	-					XC_4049	XCV4134	XAC4044	XOO0399	abs
	XCC3960	hypothetical protein	-					XC_4050	XCV4135	abs	abs	abs
	XCC3961	dipeptidyl peptidase IV	-					XC_4051	XCV4136	XAC4046	XOO0398	abs
	XCC3962	glutathione S-transferase	-	gst				XC_4052	XCV4137	XAC4047	XOO0397	abs
	XCC3963	TBDR	+	iroN				XC_4053	XCV4138	XAC4048	XOO0394	abs	Saro_1603, Novosphingobium aromaticivorans DSM 12444
	XCC3964	SapC related protein	+					XC_4054	XCV4139	XAC4049	XOO0393	abs	Saro_1605
	XCC3965	Pass1-related protein	+					XC_4055	XCV4140	XAC4050	XOO0392	abs	Saro_1606
	XCC3966	tryptophan halogenase	+	prnA				XC_4056	XCV4141	XAC4051	XOO0391	abs	Saro_1607
	XCC3967	TonB-like protein	+					XC_4057	XCV4142	XAC4052	XOO0390	abs
	XCC4049	ankyrin-like protein	-					XC_4138	abs	abs	abs	abs
	XCC4050	ankyrin-like protein	-					XC_4139	abs	abs	abs	abs
	XCC4051	hypothetical protein	-					XC_4140	abs	abs	abs	abs
	XCC4052	TBDR	-	fecA				XC_4141	abs	abs	abs	abs	CC1791, Caulobacter crescentus CB15
	XCC4053	transcriptional regulator	+					XC_4142	abs	XAC4172	XOO4549	abs	CC1792
	XCC4054	hypothetical protein	-					XC_4143	abs	XAC4173	abs	abs
	XCC4055	peptidyl-prolyl cis-trans isomerase	-					XC_4144	abs	XAC4174	abs	abs
		Putative partial CUT locus (xylan/xylose)
	XCC4113	gluconolactonase precursor	-	gnl				XC_4205	XCV4353	XAC4248	abs	abs
	XCC4114	hypothetical protein	+					XC_4206	abs	abs	abs	abs
	XCC4115	endo-1,4-beta-xylanase A	-	xynA	GH10			XC_4207	XCV4355	XAC4249	abs	abs
	XCC4116	beta-galactosidase	-		GH2			XC_4208	XCV4356	XAC4250	abs	abs
	XCC4117	hexuronic acid isomerase	-	hrmL				XC_4209	XCV4357	XAC4251	XOO4427	abs
	XCC4118	xylanase	-	xynB	GH10			XC_4210	XCV4360	XAC4254	XOO4429	abs
	XCC4119	putative hexuronate transporter	-	exuT				XC_4211	XCV4361	XAC4255	XOO4430	abs
	XCC4120	TBDR	+	cirA		Arabinose/xylan/xylose induced		XC_4212	XCV4362	XAC4256	XOO4431	abs	CC2832, Caulobacter crescentus CB15
	XCC4121	transport protein	+	xylP				XC_4213	XCV4363	XAC4257	XOO4432	abs
	XCC4122	xylosidase/arabinosidase	+	xsa	GH43			XC_4214	XCV4364	XAC4258	XOO4433	abs
	XCC4123	outer membrane lipoprotein	+	blc				XC_4215	XCV4365	XAC4259	XOO0274	abs
	XCC4124	hypothetical protein	-					XC_4216	XCV4366	XAC4260	abs	abs
	XCC4126	hypothetical protein	-					XC_4217	XCV4368	XAC4267	XOO0259 D	abs
		Putative partial CUT locus
	XCC4128	glycerol-3-phosphate acyltransferase	-	plsB				XC_4220	XCV4371	XAC4270	XOO0254	XF1031
	XCC4130	hypothetical protein	-					XC_4221	XCV4372	XAC4271	XOO0253	abs
	XCC4129	transcriptional regulator lacI family	+					XC_4222	XCV4373	XAC4272	XOO0252	abs
	XCC4131	Ps-TBDR/oar	+					XC_4223	XCV4374	XAC4273	XOO0250	abs	Sala_1015, Sphingopyxis alaskensis RB2256
	XCC4132	Ps-TBDR/oar	+					XC_4224	XCV4375-6	XAC4274	XOO0249	XF1036	Sala_1015, Sphingopyxis alaskensis RB2256
	XCC4133	tryptophan halogenase	+	prnA				XC_4225	XCV4377	XAC4275	XOO0248	abs
	XCC4134	orotidine 5'-phosphate decarboxylase	-	pyrF				XC_4226	XCV4378	XAC4276	XOO0247	XF0034
	XCC4135	acid phosphatase	-	lppC				XC_4227	XCV4379	XAC4277	XOO0246	abs
		Fur regulated TBDR
	XCC4159	hypothetical protein	-					XC_4246	XCV4397	XAC4297	XOO0286	abs
	XCC4160	hypothetical protein	+					XC_4247	XCV0647 D	abs	abs	abs
	XCC4161	hypothetical protein	+					XC_4248	XCV4398	XAC4298	abs	abs
	XCC4162	TBDR	-			Fur-regulated		XC_4249	abs	abs	abs	abs	slr1490, Synechocystis sp. PCC 6803	PA4837 (35/51)
	XCC4163	hypothetical protein	-					XC_4250	XCV4399	XAC4299	XOO4595	abs
	XCC4164	hypothetical protein	-					XC_4251	XCV4400	XAC4300	XOO4596	abs
	XCC4165	hypothetical protein	-					XC_4252	XCV4401	XAC4301	XOO4597	abs
		Putative partial CUT locus, CAZy associated TBDR, arabinose induced TBDR
	XCC4219	hypothetical protein	+					XC_4308	XCV4465	XAC4353	abs	abs
	XCC4220	amino acid transporter	+	yhdG				XC_4309	XCV4466	XAC4354	XOO4572	XF0408
	XCC4221	hypothetical protein	-		GH92			XC_4310	XCV4467	XAC4355	abs	abs
	XCC4222	Ps-TBDR	-			Arabinose induced		XC_4311	XCV4468	XAC0544	abs	abs	Pfl_3124, Pseudomonas fluorescens PfO-1	PA2057 (31/46)
	XCC4223	hypothetical protein	-					XC_4312	XCV4369	XAC4357	abs	abs
	XCC4224	hypothetical protein	-					XC_4313	XCV4470	XAC4358	abs	abs
	XCC4225	sugar diacide regulator	-					XC_4314	XCV4471	XAC4359	XOO4619 D	abs
		Putative partial CUT locus, CAZy associated TBDR, xylan induced TBDR
	XCC4232	export protein	+	ygjT				XC_4321	XCV4477	XAC4365	XOO4626	XF0406
	XCC4233	hypothetical protein	+					XC_4322	XCV4478	XAC4366	XOO4627	abs
	XCC4234	glycerophosphoryl diester phosphodiesterase	-	glpQ				XC_4324	XCV4479	XAC4367	XOO4628	abs
	XCC4235	TBDR	-	fecA				XC_4325	XCV4480	XAC4368	XOO6430	abs	Psyr_4483, Pseudomonas syringae pv. syringae B728a
	XCC4236	phosphatase precursor	+	phoC				XC_4326	XCV4482	XAC4369	XOO4633	abs
	XCC4237	Ps-TBDR/oar	+	oar		Xylan induced		XC_4327	abs	abs	abs	abs	Patl_1148, Pseudoalteromonas atlantica T6c
	XCC4238	thiophene and furan oxidation protein	-	thdF				XC_4328	XCV4483	XAC4370	XOO4634	XF2778
	XCC4239	polysaccharide deacetylase	-		CE4			XC_4329	XCV4484	XAC4371	XOO4635	XF2779
	XCC4240	60kDa inner-membrane protein	-					XC_4330	XCV4485	XAC4372	XOO4636	XF2780
	a Gene identification (ID), gene name, function and orientation are from Xanthomonas campestris pv. campestris (Xcc) strain ATCC33913 [14].
	b Family number of proteins having functional domains of enzymes that degrade, modify, or create glycosidic bonds and referenced in the CAZy database (http://afmb.cnrs-mrs.fr/CAZY/). GH: Glycoside Hydrolase; GT: Glycosyl Transferase; PL: Polysaccharide Lyase; CE: Carbohydrate Esterase; CBM: Carbohydrate-Binding Module.
	c Orthologs (i.e, a minimum of 40% identity and a ratio of 0.8 of the length of the smallest protein) were identified by Blastp searches in the corresponding genomes. Genes belonging to the same syntheny group are bright yellow shadowed and genes present elswere in the genome are dark yellow shadowed. D: deleted protein; Abs: no blast or blast with an identity lower than 40%.
	d Homologs were obtained by using the BlastP program without filter on the nr database with Xcc TBDRs as query sequences. A representative non Xanthomonads strain completely sequenced was considered. Synthenic regions (blue shadowed) were identified by reiterating the blast search using contiguous genes. Only proteins showing bidirectional identity above 30% and a ratio of 0.8 of the length of th…
	e Best homologs obtained in Pseudomonas aeruginosa PAO1 proteome by using BlastP program with Xcc TBDRs as query sequences. PAO1 TBDRs induced under iron restricted conditions [72] are orange shadowed.
