# Supplementary material for: Plant Carbohydrate Scavenging through TonB-Dependent Receptors: A Feature Shared by Phytopathogenic and Aquatic Bacteria
Source: PLoS One. 2007 Feb 21;2(2):e224. doi: 10.1371/journal.pone.0000224 (PMC1790865; doi:10.1371/journal.pone.0000224)
Supplement: Table S5 — Conservation of Xanthomonas campestris pv. campestris (Xcc) TonB-dependent receptors (TBDRs) beside Xanthomonads orthologies. (0.04 MB XLS) [file pone.0000224.s007.xls]

## Sheet: Feuil1
	Gene ID a	Subgroup b	Specificity c	Ranking of Blast results beside Xanthomonads othologs (Bacterial name; locus_tag; %Identity/%Similarity) d
				1st	2nd	3rd	4th	5th
	XCC0531	1B		X. campestris pv. campestris ATCC33913; XCC4222; 55/69
	XCC3043	1B		X. campestris pv. campestris ATCC33913; XCC3045; 56/70
	XCC3046	1B		X. campestris pv. campestris ATCC33913; XCC3045; 47/61
	XCC3045	1B		X. campestris pv. campestris ATCC33913; XCC3043; 56/70
	XCC3316	1B		X. campestris pv. campestris ATCC33913; XCC2867; 41/57
	XCC3405	1B	plant	X. campestris pv. campestris ATCC33913; XCC2867; 37/52
	XCC2395	1B		X. campestris pv. campestris ATCC33913; XCC2400; 40/57
	XCC2400	1B		X. campestris pv. campestris ATCC33913; XCC2395; 39/56
	XCC4222	1B	plant	X. campestris pv. campestris ATCC33913; XCC0531; 55/69
	XCC2887	1C		X. campestris pv. campestris ATCC33913; XCC3408; 45/60
	XCC3408	1C		X. campestris pv. campestris ATCC33913; XCC2887; 45/60
	XCC1750	1C	plant	X. campestris pv. campestris ATCC33913; XCC1749; 38/54
	XCC1990	1C		X. campestris pv. campestris 8004; XC_2484 (XCC1750); 33/49 (31/46)
	XCC2573	1D	oar	X. campestris pv. campestris ATCC33913; XCC4237; 34/51
	XCC3271	1D	oar	X. campestris pv. campestris ATCC33913; XCC4237; 35/49
	XCC4131	1D	oar	X. campestris pv. campestris ATCC33913; XCC4132; 49/64
	XCC2208	1D	oar	X. campestris pv. campestris ATCC33913; XCC4132; 42/59
	XCC4132	1D	oar	X. campestris pv. campestris ATCC33913; XCC4131; 48/64
	XCC0158	1F	iron	X. campestris pv. campestris ATCC33913; XCC3518; 38/52
	XCC0946	2B		X. campestris pv. campestris ATCC33913; XCC4235; 41/57
	XCC3714	1F		Ralstonia solanacearum GMI1000; RSp0100; 41/57	(Ralstonia solanacearum UW551); RRSL_03417; 41/57	Ralstonia solanacearum GMI1000; RSc2729; 42/55	(Ralstonia solanacearum UW551); RRSL_00729; 42/56	Burkholderia cepacia AMMD; Bamb_4928; 40/57
	XCC0394	1F		Burkholderia sp. 383; Bcep18194_B2705; 50/69	(Burkholderia cenocepacia HI2424); Bcen2424DRAFT_6742; 48/68	Rhodopseudomonas palustris HaA2; RPB_0102; 42/61	Pseudomonas fluorescens Pf-5; PFL_0646; 42/59	Pseudomonas fluorescens PfO-1; Pfl_0594; 42/60
	XCC3474	3A		Ralstonia eutropha H16; H16_B1039; 51/68	Ralstonia eutropha JMP134; Reut_A1787; 49/66	(Rubrivivax gelatinosus PM1); Rgel02002002; 44/59	(Polaromonas naphthalenivorans CJ2); PnapDRAFT_2142; 35/50	Methylobacillus flagellatus KT; Mfla_1253; 35/49
	XCC0098	3A		Bordetella bronchiseptica RB50; BB0832; 47/60	Azoarcus sp. EbN1; ebA6096; 44/58	(Rubrivivax gelatinosus PM1); Rgel02003219; 43/57	Nitrosospira multiformis ATCC 25196; Nmul_A1426; 41/57	Escherichia coli W3110; yncD; 41/59
	XCC2046	3B		(Acidovorax avenae subsp. citrulli AAC00-1); AaveDRAFT_1098; 63/76	Pseudomonas putida KT2440; PP_3340; 44/60	(Pseudomonas putida F1); PputDRAFT_4622; 43/59	Pseudomonas syringae pv. tomato str. DC3000; PSPTO_1855; 42/59	(Acidovorax avenae subsp. citrulli AAC00-1); AaveDRAFT_0325; 42/58
	XCC3177	3B		(Acidovorax avenae subsp. citrulli AAC00-1); AaveDRAFT_0325; 58/72	Pseudomonas putida KT2440; PP_3340; 50/64	(Pseudomonas putida F1); PputDRAFT_4622; 50/63	Pseudomonas syringae pv. tomato str. DC3000; PSPTO_1855; 49/63	Caulobacter crescentus CB15; CC1781; 45/60
	XCC3079	1B		Pseudomonas fluorescens PfO-1; Pfl_2342; 54/67	X. campestris pv. campestris ATCC33913; XCC3043; 41/56
	XCC3067	1B		Pseudomonas aeruginosa PAO1; PA1271; 50/64	Pseudomonas aeruginosa UCBPP-PA14; PA14_47800; 50/64	(Pseudomonas aeruginosa PA7); PaerP_01003957; 50/64	(Pseudomonas aeruginosa C3719): PaerC_01000244; 50/64	Nitrosomonas europaea ATCC 19718; NE0636; 45/63
	XCC0674	1F		Pseudomonas syringae pv. syringae B728a; Psyr_3769; 56/71	Pseudomonas syringae pv. tomato str. DC3000; PSPTO_1610; 56/72	Pseudomonas syringae pv. phaseolicola 1448A; PSPPH_1484; 55/71	Pseudomonas fluorescens Pf-5; PFL_3835; 52/71	Burkholderia sp. 383; Bcep18194_B2436; 46/63
	XCC3518	1F	iron	Pseudomonas fluorescens PfO-1; Pfl_2583; 40/55	Pseudomonas entomophila L48; PSEEN2482; 38/56	Pseudomonas fluorescens Pf-5; PFL_3315; 38/56	(Pseudomonas aeruginosa 2192); Paer2_01001533; 38/55	(Shewanella sp. W3-18-1); Sputw3181DRAFT_3279; 36/55
	XCC3595	1F	iron	Pseudomonas fluorescens Pf-5; PFL_2293; 40/58	(Pseudomonas putida F1); PputDRAFT_3079; 39/57	Pseudomonas sp.; pbuA; 40/57	Pseudomonas fluorescens PfO-1; Pfl_1848; 38/56	(Pseudomonas putida F1); PputDRAFT_3127; 39/57
	XCC3050	2A	iron	(Pseudomonas aeruginosa PA7); PaerP_01004786; 56/68	(Azotobacter vinelandii AvOP); AvinDRAFT_7778; 49/64	(Vibrio splendidus 12B01); V12B01_16041; 45/59	(Vibrio alginolyticus); vfgA; 44/60	(Vibrio alginolyticus 12G01); V12G01_04486; 44/60
	XCC4235	2B		Pseudomonas syringae pv. syringae B728a; Psyr_4483; 42/57	X. campestris pv. campestris ATCC33913; XCC0946; 43/59
	XCC0768	1B	iron	Anabaena sp. PCC 7120; alr2153; 37/54	Caulobacter crescentus CB15; CC2194; 36/52	Chromobacterium violaceum ATCC 12472; CV3896; 36/52	Synechococcus sp. JA-3-3Ab; CYA_2031; 35/51	(Caulobacter sp. K31); CaulDRAFT_0034; 35/50
	XCC4162	1F	iron	Synechocystis sp. PCC 6803; slr1490; 35/53	Anabaena sp. PCC 7120; alr2588; 35/52	Anabaena sp. PCC 7120; all2610; 36/54	Anabaena sp. PCC 7120; alr2626; 34/51	Gloeobacter violaceus PCC 7421; glr0349; 34/50
	XCC2572	1B		Shewanella sp. MR-4; Shewmr4_0124; 39/57	(Pseudoalteromonas tunicata D2); PTD2_18885; 40/57	Shewanella frigidimarina NCIMB 400; Sfri_2471; 38/57	(Alteromonas macleodii 'Deep ecotype'); MADE_02756; 39/55	(Idiomarina baltica OS145); OS145_10882; 39/56
	XCC2658	1B		(Idiomarina baltica OS145); OS145_12066; 37/51	Methylobacillus flagellatus KT; Mfla_0134; 36/55	(Pseudomonas putida F1); PputDRAFT_2116; 36/53	Ralstonia eutropha H16; H16_A0191; 35/50	Pseudomonas entomophila L48; PSEEN1173; 35/51
	XCC2867	1B		(Alteromonas macleodii 'Deep ecotype'); MADE_16410; 41/57	X. campestris pv. campestris ATCC33913; XCC3405; 37/52
	XCC2828	1C	plant	Pseudoalteromonas atlantica T6c; Patl_3278; 42/58	Colwellia psychrerythraea 34H; CPS_3698; 41/56	Caulobacter crescentus CB15; CC0999; 41/56	(marine gamma proteobacterium HTCC2207); GB2207_09881; 39/55	(Caulobacter sp. K31); CaulDRAFT_3041; 40/57
	XCC1892	1C	plant	Pseudoalteromonas haloplanktis TAC125; PSHAb0165; 37/54	(Pseudoalteromonas tunicata D2); PTD2_22047; 37/54	(Shewanella amazonensis SB2B); SamaDRAFT_2978; 37/53	Pseudoalteromonas atlantica T6c; Patl_0122; 35/51	(Caulobacter sp. K31); CaulDRAFT_2836; 28/43
	XCC3161	1C		Saccharophagus degradans 2-40; Sde_4006; 37/54	(Caulobacter sp. K31); CaulDRAFT_1586; 36/52	Saccharophagus degradans 2-40; Sde_2542; 33/47	(Caulobacter sp. K31); CaulDRAFT_1582; 34/51	X. campestris pv. campestris ATCC33913; XCC1749; 28/43
	XCC4237	1D	oar/plant	(Pseudoalteromonas tunicata D2); PTD2_04266; 43/59	X. campestris pv. campestris ATCC33913; XCC2573; 34/51
	XCC1391	1F	iron	Pseudoalteromonas haloplanktis TAC125; PSHAb0279; 47/67	Shewanella sp. MR-4; Shewmr4_2386; 44/59	Shewanella sp. MR-7; Shewmr7_2458; 43/59	(Shewanella sp. ANA-3); Shewana3DRAFT_4183; 44/60	Pseudoalteromonas atlantica T6c; Patl_1142; 41/58
	XCC1037	1H		(Pseudoalteromonas tunicata D2); PTD2_15087; 44/62	Sphingopyxis alaskensis RB2256; Sala_0027; 45/60	Pseudoalteromonas haloplanktis TAC125; PSHAa2180; 44/62	Caulobacter crescentus CB15; CC1970; 44/61	Colwellia psychrerythraea 34H; CPS_1977; 43/60
	XCC3036	2B		Idiomarina loihiensis L2TR; IL2594; 44/61	(gamma proteobacterium KT 71); KT71_02412; 42/58	Pseudoalteromonas atlantica T6c; Patl_3410; 41/58	Pseudoalteromonas atlantica T6c; Patl_2585; 39/58	(Alteromonas macleodii 'Deep ecotype'); MADE_16255; 39/56
	XCC2385	1C		(Desulfuromonas acetoxidans DSM 684); Dace_2425; 34/51	(Alteromonas macleodii 'Deep ecotype'); MADE_18984; 34/51	(Pseudoalteromonas tunicata D2); PTD2_04446; 33/53	(Sphingomonas sp. SKA58); SKA58_03800; 33/51	(Azotobacter vinelandii AvOP); AvinDRAFT_2260; 35/52
	XCC2665	1B		Sphingopyxis alaskensis RB2256; Sala_0305; 40/60	Shewanella frigidimarina NCIMB 400; Sfri_3503; 36/54	Colwellia psychrerythraea 34H; CPS_0977; 34/53	(Pseudoalteromonas tunicata D2); PTD2_20302; 34/51	Pseudoalteromonas atlantica T6c; Patl_1822; 33/52
	XCC3358	1B	plant	Caulobacter crescentus CB15; CC1136; 58/74	(Shewanella baltica OS195); Sbal195DRAFT_3485; 43/69	(Shewanella baltica OS155); SbalDRAFT_3744; 53/69	Shewanella sp. MR-7; Shewmr7_0064; 53/69	Shewanella frigidimarina NCIMB 400; Sfri_3988; 53/70
	XCC0397	1B		(Oceanicaulis alexandrii HTCC2633); OA2633_12910; 35/50	Pseudoalteromonas atlantica T6c; Patl_3441; 34/50	Caulobacter crescentus CB15; CC1666; 34/50	Pseudoalteromonas haloplanktis TAC125; PSHAa2973; 33/50	Pseudoalteromonas haloplanktis TAC125; PSHAa1271; 33/50
	XCC1340	1B		(Caulobacter sp. K31); CaulDRAFT_0125; 40/55	Gluconobacter oxydans 621H; GOX0945; 28/45	(Oceanicaulis alexandrii HTCC2633); OA2633_07829; 29/46	Zymomonas mobilis subsp. mobilis ZM4; ZMO1040; 28/45	(Pseudoalteromonas tunicata D2); PTD2_06374; 30/46
	XCC3427	1C		Sphingopyxis alaskensis RB2256; Sala_0313; 41/57	(Sphingomonas sp. SKA58); SKA58_09651; 39/56	Caulobacter crescentus CB15; CC0171; 40/55	Novosphingobium aromaticivorans DSM 12444; Saro_2438; 39/56	(Oceanicaulis alexandrii HTCC2633); OA2633_11970; 36/54
	XCC3963	1C		Novosphingobium aromaticivorans DSM 12444; Saro_1603; 45/62	(Sphingomonas sp. SKA58); SKA58_00625; 45/61	Shewanella frigidimarina NCIMB 400; Sfri_1313; 44/60	(Shewanella baltica OS195); Sbal195DRAFT_0485; 43/60	Colwellia psychrerythraea 34H; CPS_3737; 42/59
	XCC0119	1C		Maricaulis maris MCS10; Mmar10_0224; 43/58	Caulobacter crescentus CB15; CC0442; 40/56	Saccharophagus degradans 2-40; Sde_0952; 40/56	X. campestris pv. campestris ATCC33913; XCC0120; 39/52
	XCC0759	1C		Gluconobacter oxydans 621H; GOX1188; 35/50	Caulobacter crescentus CB15; CC0562; 35/51	X. campestris pv. campestris ATCC33913; XCC3209; 27/43
	XCC0050	1C	plant	Caulobacter crescentus CB15; CC1791; 35/51	Caulobacter crescentus CB15; CC1113; 29/45	X. campestris pv. campestris ATCC33913; XCC4052; 28/44
	XCC3635	1C		Caulobacter crescentus CB15; CC1131; 48/62	(Caulobacter sp. K31); CaulDRAFT_3050; 37/55	(Caulobacter sp. K31); CaulDRAFT_3053; 37/54	(marine gamma proteobacterium HTCC2207); GB2207_01907; 32/48	Colwellia psychrerythraea 34H; CPS_2359; 29/49
	XCC1041	1C	hrp	Caulobacter crescentus CB15; CC1113; 31/45	X. campestris pv. campestris ATCC33913; XCC4052; 28/45
	XCC4052	1C		Caulobacter crescentus CB15; CC1113; 30/47	X. campestris pv. campestris ATCC33913; XCC1041; 28/45
	XCC3209	1C		Caulobacter crescentus CB15; CC0563; 30/49	X. campestris pv. campestris ATCC33913; XCC0759; 27/43
	XCC2944	1C		Caulobacter crescentus CB15; CC0446; 37/54	X. campestris pv. campestris ATCC33913; XCC3408; 37/52
	XCC0120	1C	plant	Caulobacter crescentus CB15; CC0442; 38/51	Maricaulis maris MCS10; Mmar10_0224; 36/50	(Sphingomonas sp. SKA58); SKA58_03670; 34/51	(Caulobacter sp. K31); CaulDRAFT_2832; 33/46	Sphingopyxis alaskensis RB2256; Sala_3041; 33/47
	XCC4120	1C	plant	(Caulobacter sp. K31); CaulDRAFT_3665; 51/65	(Sphingomonas sp. SKA58); SKA58_04811; 44/61	Caulobacter crescentus CB15; CC2832; 44/58	X. campestris pv. campestris ATCC33913; XCC0119; 28/42
	XCC1749	1C	plant	(Caulobacter sp. K31); CaulDRAFT_2405; 43/59	X. campestris pv. campestris ATCC33913; XCC1750; 38/54
	XCC2469	1C	plant	(Caulobacter sp. K31); CaulDRAFT_1654; 38/55	Caulobacter crescentus CB15; CC1754; 36/54	Maricaulis maris MCS10; Mmar10_2735; 38/54	Shewanella frigidimarina NCIMB 400; Sfri_1787; 37/55	Caulobacter crescentus CB15; CC2287; 36/54
	XCC1258	1C		(Caulobacter sp. K31); CaulDRAFT_1139; 46/60	Saccharophagus degradans 2-40; Sde_3880; 36/55	(Alteromonas macleodii 'Deep ecotype'); MADE_11505; 33/52	Saccharophagus degradans 2-40; Sde_0682; 30/48	(Caulobacter sp. K31); CaulDRAFT_1147; 29/46
	XCC2497	1D	oar	(Parvularcula bermudensis HTCC2503); PB2503_02212; 34/50	(Oceanicaulis alexandrii HTCC2633); OA2633_12585; 32/48	Pseudoalteromonas haloplanktis TAC125; PSHAb0340; 32/48	Maricaulis maris MCS10; Mmar10_0368; 34/48	(Alteromonas macleodii 'Deep ecotype'); MADE_07746; 32/47
	XCC2772	1F	iron	(Sphingomonas sp. SKA58); SKA58_12165; 47/61	(Pseudomonas aeruginosa PA7); PaerP_01004007; 40/56	(Pseudomonas aeruginosa 2192); Paer2_01000319; 39/55	Pseudomonas aeruginosa PAO1; PA1322; 39/55	(Pseudomonas aeruginosa PACS2); PaerPA_01001801; 39/55
	XCC1179	1H		(Caulobacter sp. K31); CaulDRAFT_3818; 73/83	Caulobacter crescentus CB15; CC1970; 50/63	(Caulobacter sp. K31); CaulDRAFT_0617; 48/63	(Alteromonas macleodii 'Deep ecotype'); MADE_03081; 45/59	(Oceanicaulis alexandrii HTCC2633); OA2633_01564; 43/59
	XCC1719	1H	hrp	(Caulobacter sp. K31); CaulDRAFT_0763; 50/65	Caulobacter crescentus CB15; CC3336; 49/63	(Caulobacter sp. K31); CaulDRAFT_5326; 48/62	Maricaulis maris MCS10; Mmar10_1115; 41/57	(Oceanicaulis alexandrii HTCC2633); OA2633_00415; 41/56
	XCC3279	2B		Caulobacter crescentus CB15; CC3436; 31/47	(Parvularcula bermudensis HTCC2503); PB2503_08669; 30/49	Hyphomonas neptunium ATCC 15444; HNE_2355; 30/47	(Caulobacter sp. K31); CaulDRAFT_4856; 32/46	Pseudomonas syringae pv. tomato str. DC3000; PSPTO_0671; 29/45
	a Gene identification (ID) from Xanthomonas campestris pv. campestris strain ATCC33913 [14].
	b From the phylogenetic tree presented on Figure S1.
	c Iron: TBDR probably involved in iron uptake; plant: TBDR probably involved in plant carbohydrate uptake; Oar: TBDR of the Oar-like subclass; hrp: TBDR gene regulated by hrp regulators.
	d Blast hit results with similarities lower than those obtained with non orthologous Xcc TBDRs were not included. Only the five first results were shown. Colors correspond to bacterial classification: a- (blue), b- (orange), d-proteobacteria (pink), g- (green) proteobacteria, Xanthomonas (yellow) or cyanobacteria (violet).
