# Supplementary material for: Plant Carbohydrate Scavenging through TonB-Dependent Receptors: A Feature Shared by Phytopathogenic and Aquatic Bacteria
Source: PLoS One. 2007 Feb 21;2(2):e224. doi: 10.1371/journal.pone.0000224 (PMC1790865; doi:10.1371/journal.pone.0000224)
Supplement: Table S6 — List of plasmids and Xanthomonas campestris pv. campestris strains used or generated in this study. (0.03 MB XLS) [file pone.0000224.s008.xls]

## Sheet: Feuil1
	Plasmids	Features	Xcc sequence cloned relative to the putative start codon	Reference
	pVO155	pUC119 derivative, containing the promoterless gus (uidA) reporter gene encoding β-glucuronidase, used for insertion mutagenesis; KmR AmpR		[36]
	pLAFR6	pLAFR1 with trp terminators; TetR		[108]
	pFAJ1700	pTR102-derived expression vector, containing a multiple cloning site and transcriptional terminators in both orientations; TetR AmpR		[109]
	pSC154	pET-26b(+) derived vector with the cyaA' gene from pMS107 used for translational fusion constructs. The T7 promoter has been replaced by Ptac promoter sequence; KmR		[107]
	pCZ367	pUC18-derived vector used for insertional mutagenesis; AmpR GmR		[107]
	pCZ750	pFAJ1700 containing the KpnI-AscI lacZ gene from the pCZ367 plasmid; TetR AmpR		This study
	pCZ525	pSC154 DcyaA'; KmR		This study
	pL-XCC3358; pL-suxA	pCZ525-XCC3358-pLAFR6; TetR KmR	from - 247 to + 2474	This study
	pL-XCC3359; pL-suxB	pCZ525-XCC3359-pLAFR6; TetR KmR	from - 15 to + 1913	This study
	pL-XCC1470; pL-fur	pFAJ1700-XCC1470; TetR AmpR	from - 95 to + 545	This study
	pPr-XCC3358; pPr-suxA	pFAJ1700-lacZ-prXCC3358; TetR AmpR	from - 580 to + 459	This study
	pPr-XCC1990	pFAJ1700-lacZ-prXCC1990; TetR AmpR	from - 500 to + 1	This study
	pPr-XCC3209	pFAJ1700-lacZ-prXCC3209; TetR AmpR	from - 500 to + 1	This study
	Strains	Genotype and/or phenotype	Location of insertion or deletion relative to the putative start codon	Reference
	Xcc568	Wild-type strain; Rifampycin resistant strain derivative of Xanthomonas campestris pv. campestris LMG568/ATCC33913		[113]
	XP001	XCC0050::pVO155; RifR KmR	+ 2473	This study
	XP002	XCC0098::pVO155; RifR KmR	+ 784	This study
	XP003	XCC0119::pVO155; RifR KmR	+ 1084	This study
	XP004	XCC0120::pVO155; RifR KmR	+ 3119	This study
	XP005	XCC0158::pVO155; RifR KmR	+ 691	This study
	XP006	XCC0304::pVO155; RifR KmR	+ 765	This study
	XP007	XCC0305::pVO155; RifR KmR	+ 1007	This study
	XP008	XCC0394::pVO155; RifR KmR	+ 2082	This study
	XP009	XCC0397::pVO155; RifR KmR	+ 406	This study
	XP010	XCC0531::pVO155; RifR KmR	+ 736	This study
	XP011	XCC0674::pVO155; RifR KmR	+ 1958	This study
	XP012	XCC0759::pVO155; RifR KmR	+ 418	This study
	XP013	XCC0768::pVO155; RifR KmR	+ 387	This study
	XP014	XCC0946::pVO155; RifR KmR	+ 2091	This study
	XP015	XCC1037::pVO155; RifR KmR	+ 502	This study
	XP016	XCC1041::pVO155; RifR KmR	+ 1249	This study
	XP017	XCC1179::pVO155; RifR KmR	+ 1632	This study
	XP018	XCC1258::pVO155; RifR KmR	+ 2524	This study
	XP019	XCC1340::pVO155; RifR KmR	+ 1205	This study
	XP020	XCC1391::pVO155; RifR KmR	+ 878	This study
	XP021	XCC1719::pVO155; RifR KmR	+ 244	This study
	XP022	XCC1749::pVO155; RifR KmR	+ 966	This study
	XP023	XCC1750::pVO155; RifR KmR	+ 1657	This study
	XP024	XCC1751::pVO155; RifR KmR	+ 304	This study
	XP025	XCC1892::pVO155; RifR KmR	+ 1274	This study
	XP026	XCC2046::pVO155; RifR KmR	+ 200	This study
	XP027	XCC2208::pVO155; RifR KmR	+ 2036	This study
	XP028	XCC2385::pVO155; RifR KmR	+ 1285	This study
	XP029	XCC2395::pVO155; RifR KmR	+ 1258	This study
	XP030	XCC2400::pVO155; RifR KmR	+ 2355	This study
	XP031	XCC2469::pVO155; RifR KmR	+ 201	This study
	XP032	XCC2497::pVO155; RifR KmR	+ 1880	This study
	XP033	XCC2572::pVO155; RifR KmR	+ 830	This study
	XP034	XCC2573::pVO155; RifR KmR	+ 866	This study
	XP035	XCC2658::pVO155; RifR KmR	+ 1556	This study
	XP036	XCC2665::pVO155; RifR KmR	+ 780	This study
	XP037	XCC2772::pVO155; RifR KmR	+ 833	This study
	XP038	XCC2828::pVO155; RifR KmR	+ 2871	This study
	XP039	XCC2867::pVO155; RifR KmR	+ 293	This study
	XP040	XCC2887::pVO155; RifR KmR	+ 1558	This study
	XP041	XCC2944::pVO155; RifR KmR	+ 334	This study
	XP042	XCC3036::pVO155; RifR KmR	+ 451	This study
	XP043	XCC3043::pVO155; RifR KmR	+ 428	This study
	XP044	XCC3045::pVO155; RifR KmR	+ 1572	This study
	XP045	XCC3046::pVO155; RifR KmR	+ 702	This study
	XP046	XCC3050::pVO155; RifR KmR	+ 295	This study
	XP047	XCC3067::pVO155; RifR KmR	+ 929	This study
	XP048	XCC3079::pVO155; RifR KmR	+ 1195	This study
	XP049	XCC3161::pVO155; RifR KmR	+ 835	This study
	XP050	XCC3177::pVO155; RifR KmR	+ 723	This study
	XP051	XCC3215::pVO155; RifR KmR	+ 365	This study
	XP052	XCC3216::pVO155; RifR KmR	+ 397	This study
	XP053	XCC3270::pVO155; RifR KmR	+ 747	This study
	XP054	XCC3271::pVO155; RifR KmR	+ 961	This study
	XP055	XCC3279::pVO155; RifR KmR	+ 1481	This study
	XP056	XCC3316::pVO155; RifR KmR	+ 2262	This study
	XP057	suxA::pVO; XCC3358::pVO155; RifR KmR	+ 817	This study
	XP058	XCC3405::pVO155; RifR KmR	+ 1813	This study
	XP059	XCC3408::pVO155; RifR KmR	+ 1897	This study
	XP060	XCC3427::pVO155; RifR KmR	+ 2236	This study
	XP061	XCC3474::pVO155; RifR KmR	+ 1443	This study
	XP062	XCC3518::pVO155; RifR KmR	+ 452	This study
	XP063	XCC3595::pVO155; RifR KmR	+ 2148	This study
	XP064	XCC3635::pVO155; RifR KmR	+ 367	This study
	XP065	XCC3714::pVO155; RifR KmR	+ 922	This study
	XP066	XCC3963::pVO155; RifR KmR	+ 1243	This study
	XP067	XCC4052::pVO155; RifR KmR	+ 1673	This study
	XP068	XCC4120::pVO155; RifR KmR	+ 1217	This study
	XP069	XCC4131::pVO155; RifR KmR	+ 952	This study
	XP070	XCC4132::pVO155; RifR KmR	+ 2804	This study
	XP071	XCC4162::pVO155; RifR KmR	+ 952	This study
	XP072	XCC4222::pVO155; RifR KmR	+ 2401	This study
	XP073	XCC4235::pVO155; RifR KmR	+ 1405	This study
	XP074	XCC4237::pVO155; RifR KmR	+ 225	This study
	XP075	XCC1990D1; RifR	from + 1 to + 2619	This study
	XP076	XCC3209D1; RifR	from + 1 to + 2715	This study
	XP077	fur1; XCC1470 T212A leading to L71Q; RifR	T212A leading to L71Q	This study
	XP078	Xcc568 (pL-fur); Xcc568 (pL-XCC1470); RifR TetR AmpR		This study
	XP079	fur1 (pL-fur); XCC1470 T212A (pL-XCC1470); RifR TetR AmpR		This study
	XP080	Xcc568 (pPr-XCC1990); RifR TetR AmpR		This study
	XP081	Xcc568 (pPr-XCC3209); RifR TetR AmpR		This study
	XP082	hrpG::pVO; XCC1166::pVO155; RifR KmR	+ 487	[113]
	XP083	hrpX::pVO; XCC1167::pVO155; RifR KmR	+ 1013	This study
	XP084	suxR::pVO; XCC3356::pVO155; RifR KmR	+ 350	This study
	XP085	suxC::pVO; XCC3357::pVO155; RifR KmR	+ 896	This study
	XP086	suxB::pVO; XCC3359::pVO155; RifR KmR	+ 757	This study
	XP087	DsuxA; XCC3358D1; RifR	from + 474 to + 2475	This study
	XP088	DsuxB; XCC3359D1; RifR	from + 1 to +1914	This study
	XP089	Xcc568 (pL-suxA); Xcc568 (pL-XCC3358); RifR TetR		This study
	XP090	suxA::pVO (pL-suxA); XCC3358::pVO155 (pL-XCC3358); RifR KmR TetR		This study
	XP091	DsuxA (pL-suxA); XCC3358D1 (pL-XCC3358); RifR TetR		This study
	XP092	Xcc568 (pL-suxB); Xcc568 (pL-XCC3359); RifR TetR		This study
	XP093	suxA::pVO (pL-suxB); XCC3358::pVO (pL-XCC3359); RifR KmR TetR		This study
	XP094	DsuxB (pL-suxB); XCC3359D1 (pL-XCC3359); RifR TetR		This study
	XP095	Xcc568 (pPr-suxA); Xcc568 (pPr-XCC3358); RifR TetR AmpR		This study
	XP096	suxR::pVO (pPr-suxA); XCC3356::pVO155 (pPr-XCC3358); RifR KmR TetR AmpR		This study
	XP097	suxC::pVO (pPr-suxA); XCC3357::pVO155 (pPr-XCC3358); RifR KmR TetR AmpR		This study
	XP098	DsuxA (pPr-suxA); XCC3358D1 (pPr-XCC3358); RifR TetR AmpR		This study
	XP099	DsuxB (pPr-suxA); XCC3359D1 (pPr-XCC3358); RifR TetR AmpR		This study
	XP100	XCC0008::pVO155; RifR KmR	+ 425	This study
	XP101	XCC1592::pVO155; RifR KmR	+ 293	This study
	XP102	XCC1593::pVO155; RifR KmR	+ 243	This study
	XP103	XCC2081::pVO155; RifR KmR	+ 143	This study
	XP104	XCC2612::pVO155; RifR KmR	+ 124	This study
	XP105	XCC2927D1; RifR	from +3 to + 876	This study
	XP106	XCC3205::pVO155; RifR KmR	+ 704	This study
	XP107	XCC3967::pVO155; RifR KmR	+ 274	This study
